1 **Characterization of ethylene-inducible pedicel-fruit abscission zone formation in non-**  
2 **climacteric sweet cherry (*Prunus avium* L.)**

3

4 Seanna L. Hewitt<sup>1,2\*</sup>, Benjamin Kilian<sup>1,2\*</sup>, Tyson Koepke<sup>1,2</sup>, Jonathan Abarca<sup>1</sup>, Matthew  
5 Whiting<sup>1,3</sup>, and Amit Dhingra<sup>1,2§</sup>

6

7 <sup>1</sup>Department of Horticulture, Washington State University, Pullman WA 99164-6414

8 <sup>2</sup>Molecular Plant Sciences Graduate Program, Washington State University, Pullman, WA 99164

9 <sup>3</sup>Irrigated Agriculture Research and Extension Center, Washington State University, Prosser, WA

10 99350

11 \*Authors contributed equally to this work

12

13 §Corresponding author

14

15

16 **Abstract**

17 Sweet cherry (*Prunus avium* L.) fruit harvest is a labor-intensive process. Mechanical harvesting  
18 of sweet cherry fruit is feasible; however, it is dependent on the formation of an abscission zone  
19 at the fruit-pedicle junction. The natural propensity for pedicle-fruit abscission zone (PFAZ)  
20 formation varies by cultivar, and the general molecular basis for PFAZ formation is not well  
21 characterized. In this study, ethylene-inducible change in pedicle fruit retention force (PFRF) was  
22 recorded in a developmental time course with a concomitant analysis of the PFAZ transcriptome  
23 from three sweet cherry cultivars. In ‘Skeena’, mean PFRF for both control and treatment fruit  
24 dropped below the 0.40kg-force (3.92N) threshold for mechanical harvesting and indicating the  
25 formation of a discrete PFAZ. In ‘Bing’, mean PFRF for both control and treatment groups  
26 decreased over time. However, a mean PFRF conducive to mechanical harvesting was achieved  
27 only in the ethylene-treated fruit. While in ‘Chelan’ the mean PFRF of the control and treatment  
28 groups did not meet the threshold required for efficient mechanical harvesting. Transcriptome  
29 analysis of the PFAZ followed by the functional annotation, differential expression analysis, and  
30 gene ontology (GO) enrichment analyses of the data facilitated the identification of phytohormone-  
31 responsive and abscission-related transcripts as well as processes that exhibited differential  
32 expression and enrichment in a cultivar-dependent manner over the developmental time-course.  
33 Additionally, read alignment-based variant calling revealed several short variants within essential  
34 ethylene- and auxin-responsive genes, likely explaining differences in phytohormone-responses  
35 between the cultivars. These results provide genetic targets for induction or inhibition of PFAZ  
36 formation, depending on the desire to harvest the fruit with or without the stem attached.  
37 Understanding the genetic mechanisms underlying the development of the PFAZ will inform  
38 future cultivar development while laying a foundation for mechanized sweet cherry harvest.

39 **Key Words**

40 Ethephon, ethylene, auxin, RNA-seq, transcriptome, *Prunus avium*, abscission, qRT-PCR, gene

41 expression, Rosaceae

## 42 **Introduction**

43 Sweet cherry (*Prunus avium* L.), a member of the Rosaceae family, is a commercially  
44 important tree fruit crop throughout the world, with approximately 2.3 million tons produced  
45 annually (Axe and Bush 2017, Blando and Oomah 2019). In addition to its worldwide economic  
46 value, production, and consumption of sweet cherries has increased in recent years as consumers  
47 have become aware of their nutritional benefits (Blando and Oomah 2019). The industry is  
48 evolving to address the growing market, availability of labor during harvest, and has begun  
49 adapting harvesting strategies to meet new consumer demand for stemless cherries (Kappel et al.  
50 2012, Quero-García et al. 2017). Traditional harvesting methods focus on separating the fruit from  
51 the tree at the pedicel-peduncle junction, leaving the pedicel (stem) attached to the fruit  
52 (Wittenbach and Bukovac 1974b). Mechanical harvesting, on the other hand, is best achieved  
53 when the fruit abscises easily at the fruit-pedicel junction (Quero-García, Schuster, López-Ortega  
54 and Charlot 2017). Increasing labor costs associated with traditional hand harvesting, in addition  
55 to the growing demand for stemless fruit, has made adoption of mechanical harvesting strategies  
56 attractive if they can be made uniform across cultivars (Zhou et al., 2016). However, the harvesting  
57 of sweet cherries has presented a unique set of challenges. Unlike sour cherries (*Prunus cerasus*),  
58 which develop an anatomically and histologically distinct fruit-pedicel abscission zone (PFAZ)  
59 and separate with ease, sweet cherry cultivars display phenotypic differences in PFAZ formation  
60 and consequent ease of fruit separation—some cultivars require excessive force to separate fruit  
61 at the PFAZ, which tends to compromise fruit quality and integrity (Stösser et al. 1969, Zhao et al.  
62 2013).

63 While sweet cherry and peach belong to the same sub-family, the former bears non-  
64 climacteric fruits that do not produce ethylene autocatalytically during ripening and senescence.

65 This is most likely due to the presence of several stop codon mutations in the ethylene biosynthesis  
66 and perception genes in sweet cherry (Koepke et al. 2013). However, sweet cherry fruit from some  
67 cultivars displays a novel developmental response to exogenous ethylene application (Hiwasa-  
68 Tanase and Ezura 2014). Exogenous ethylene application can induce or enhance PFAZ formation,  
69 loosening the fruit, and facilitating efficient mechanical harvesting (Smith and Whiting 2010,  
70 Wittenbach and Bukovac 1974a).

71 Pedicel-fruit retention force (PFRF) is used as a direct measure of PFAZ formation and  
72 serves as a metric to determine the mechanical harvestability of the fruit. An average PFRF value  
73 of 0.40kg-force (3.92N) is considered the threshold for mechanical harvestability, though this will  
74 depend on the actuation method of the harvester. A reduction in PFRF can be induced through the  
75 application of ethephon (2-chloroethylephosphonic acid), a commercially available plant growth  
76 regulator that is rapidly metabolized to ethylene (Smith and Whiting 2010, Zhao, Athanson,  
77 Whiting and Oraguzie 2013). The natural PFRF of sweet cherry varies by cultivar, with some  
78 varieties, like ‘Skeena’, exhibiting an auto-abscising phenotype and requiring no exogenous  
79 ethylene to induce abscission. Representing an intermediate phenotype, ‘Bing’ can be induced to  
80 abscise when ethephon is applied approximately 14 days before harvest (Smith and Whiting 2010,  
81 Zhao, Athanson, Whiting and Oraguzie 2013). ‘Chelan’, on the contrary, does not abscise naturally  
82 or in the presence of ethephon (Smith and Whiting 2010).

83 Sweet cherry phenotyping studies have shown that PFRF values remain consistent for  
84 these cultivars across multiple years, indicating that the abscission phenotypes are genetically  
85 stable and can perhaps be manipulated at the genetic level (Zhao, Athanson, Whiting and Oraguzie  
86 2013). Furthermore, these findings suggest that standardization of PFRF for mechanical harvesting  
87 across cultivars is possible if the ideal ethephon or other treatment regimens are determined for

88 individual sweet cherry cultivars. Despite the extensive physiological characterization of PFAZ  
89 integrity across sweet cherry varieties, the underlying molecular basis for PFAZ structural  
90 differences has not previously been elucidated.

91         As understood from studies in model plant systems such as *Arabidopsis* and tomato,  
92 abscission at the fruit-pedicle junction entails a series of hallmark structural changes: the middle  
93 lamella is dissolved by hydrolytic enzymes, such as polygalacturonase and cellulase (Taylor et al.  
94 1991); cell walls in the separation layer thicken, and cell wall components become hydrated as a  
95 result (Huberman et al. 1983); primary cell walls break down as abscission progresses, resulting  
96 in the formation of large intercellular cavities (Tabuchi et al. 2000); and lignin deposits accumulate  
97 proximally to the abscission zone, forming part of a peridermal boundary layer that will serve to  
98 protect the pedicel scar following fruit separation (Merelo et al. 2017, Tabuchi et al. 1998). This  
99 process is thought to operate in a similar manner in fruit crops including apple, peach, and olive  
100 although species and cultivar-specific differences, particularly with regards to chemical induction  
101 of abscission in these crops, are not yet well understood (Ali et al. 2012, Botton et al. 2011, Gil-  
102 Amado and Gomez-Jimenez 2013, Zhu et al. 2011).

103         According to the current model of abscission in plants, the genetic events underlying  
104 cellular structure modification at the PFAZ center around an interplay between ethylene and auxin-  
105 associated pathways. Binding of ethylene to corresponding receptors (ETRs) in PFAZ cells  
106 initiates signal transduction pathways leading to the activation of numerous, ethylene-responsive  
107 transcription factors (ERFs), which elicit different modulatory roles. The ethylene response and  
108 signaling network ultimately results in the initiation of cell death, reduction in cell wall adhesion,  
109 and separation of the fruit from the pedicel (Roberts et al. 2002). Working antagonistically to  
110 ethylene is the phytohormone auxin. Auxin's biologically active form, free indole-3-acetic acid

111 (IAA), decreases the sensitivity of plant organs to ethylene. The genetic and metabolic factors  
112 governing auxin homeostasis ensure that an appropriate balance is maintained between free IAA,  
113 IAA-conjugates, and auxin degradation during different developmental stages (Meir et al. 2010).  
114 A presence of higher levels of free IAA corresponds to inhibited or delayed ethylene-dependent  
115 developmental responses like abscission zone formation (Else et al. 2004). Decreasing polar auxin  
116 transport across the abscission zone in sweet cherries by girdling methods results in increased fruit  
117 abscission (Blanusa et al. 2005). Additionally, in grape, the application of inhibitors of auxin  
118 transport has been shown to promote increased abscission (Kühn et al. 2016).

119 While there is evidence implicating the involvement of numerous ethylene-associated  
120 transcription factors and auxin-associated genes in the modulation of PFAZ formation, species-  
121 specific modes of action have yet to be resolved (Roberts, Elliott and Gonzalez-Carranza 2002).  
122 The induction of PFAZ formation in response to exogenous ethylene application in the non-  
123 climacteric fruit sweet cherry represents a unique biological system to elucidate the process of  
124 inducible abscission. An improved understanding of the interplay between auxin and ethylene  
125 response in sweet cherry will facilitate improved strategies for planned induction or inhibition of  
126 PFAZ formation.

127 To elucidate the molecular bases for differences in abscission phenotypes among sweet  
128 cherry cultivars, and to correlate this information with fruit development, time course  
129 physiological measurements of the PFRF along with concomitant transcriptome analysis of the  
130 PFAZ tissue from ethylene-treated and control ‘Bing’, ‘Skeena’, and ‘Chelan’ was conducted. The  
131 hypothesis that cultivar-specific gene expression differences in ethylene- and auxin-responsive  
132 pathways are directly correlated to the differences in abscission phenotypes was evaluated. The  
133 results of this study reveal potential genetic targets for PFAZ formation in sweet cherry, which are

134 expected to inform strategies for improving PFAZ phenotypes conducive to different harvesting  
135 approaches.

## 136 **Methods**

### 137 *Plant Material*

138 The sweet cherry trees used in this study are located at Washington State University's Roza  
139 Farm, 10 km north of Prosser, Washington, USA (46.2°N, 119.7°). Trees were irrigated weekly  
140 from bloom to leaf senescence with low-volume, under-tree, micro-sprinklers, and grown using  
141 standard orchard management practices. Trees had an in-row spacing of 2.44 m (8 ft) and between  
142 row spacing of 4.27 m (14 ft). Rows were planted in a north-south orientation and trained to a Y-  
143 trellis architecture.

### 144 *Ethephon application*

145 Ethephon (formula 240 g/l [2lbs/gal]) was applied via air-blast sprayer at 3.5 L ha<sup>-1</sup> (3 pt  
146 A<sup>-1</sup>) with a 1,871 L ha<sup>-1</sup> (200 g A<sup>-1</sup>) spray volume (Smith and Whiting 2010). Applications and  
147 measurements were conducted in three different years (2010, 2013, and 2014). Transcriptome  
148 analysis using RNAseq was performed with tissues collected in 2014. Each replication was  
149 performed in the same orchard block, using distinct trees within the block. Treatment application  
150 was done early in the morning (between 0600 and 0800 hours) to reduce the effects of ethylene  
151 evolution from warm temperatures and wind, as previously described (Smith and Whiting 2010).

152 Optimal ethephon application time for 'Bing' had been established previously as 14 days  
153 before harvest (DBH) (Smith and Whiting 2010), or 80% fruit maturation. Because 'Bing',  
154 'Chelan', and 'Skeena' have different timelines for the maturation of fruit after bloom, ethephon  
155 was applied at ca. 80% maturation for each of the cultivars in the 2014 growing season. This  
156 percentage coincided with 14 DBH for 'Bing', 12 DBH for 'Chelan' and 16 DBH for 'Skeena'



157 (Supplementary File 1). Information regarding ethephon treatment, and PFRF results for 2010 and  
158 2013 can be found in Supplementary File 2.

### 159 *PFRF measurements and abscission zone sampling*

160 In all three years, sampling and measurements were conducted at the following time points  
161 for each sweet cherry cultivar: (1) immediately following application of ethephon or H<sub>2</sub>O; (2) 6  
162 hours after the application of ethephon or H<sub>2</sub>O, and (3) at harvest.

163 At each sampling time, ten fruit were randomly selected for analysis from each of 4  
164 trees/cultivar/treatment. PFRF was measured using a modified digital force gauge (Imada). In  
165 addition to the collection of PFRF values, the abscission zones of 10 fruit from each  
166 cultivar/treatment were harvested from corresponding trees at each time point per the following  
167 steps: 1.) Using a new razor blade, the fruit was first cut approximately 0.5 cm below the pedicel,  
168 leaving the pedicel and a thin disc of fruit/skin attached, 2.) two sets of parallel cuts were made  
169 downward on the cherry fruit disc on either side of the stem, effectively making a cubic piece of  
170 fruit 3mm x 3mm x 3mm attached to the pedicel, 3.) the pedicel was cut off directly above the fruit  
171 and the cube of fruit tissue consisting the abscission zone and some fruit and pedicel tissue was  
172 placed in a 15ml falcon tube and flash frozen for subsequent processing (Supplementary File 3).

### 173 *Total RNA Extraction*

174 Excised sweet cherry abscission zone tissue derived from 40 fruits / 4 trees / cultivar / time  
175 point was pulverized and homogenized into a single sample using a SPEX SamplePrep®  
176 FreezerMill 6870 (Metuchen, NJ USA) and the transferred to storage at -80°C. Total RNA was  
177 extracted using an acid guanidinium thiocyanate phenol chloroform extraction method similar to  
178 that previously described (**Chomczynski and Sacchi 1987**). Briefly, 1mL of 0.8M guanidinium

179 thiocyanate, 0.4M ammonium thiocyanate, 0.1M sodium acetate pH 5.0, 5% w/v glycerol, and  
180 38% v/v water saturated phenol were added to approximately 100 mg powdered tissue, shaken to  
181 evenly mix the sample and incubated at room temperature (RT) for 5 minutes. 200 $\mu$ L chloroform  
182 was added and shaken vigorously until the entire sample became homogeneously cloudy and then  
183 was incubated (RT, 3 minutes). Samples were centrifuged at 17,000 x g at 4°C for 15 minutes, and  
184 the aqueous upper phase was transferred to a clean 1.5mL microcentrifuge tube. To this, 600 $\mu$ L 2-  
185 propanol was added, inverted 5-6 times, and incubated at RT for 10 minutes. Samples were  
186 centrifuged 17,000 x g at 4°C for 10 minutes, and the supernatant decanted. 1 mL 75% DEPC  
187 ethanol was added to the pellet, vortexed for 10 seconds, and centrifuged 9,500 x g at 4°C for 5  
188 minutes. Pellets were then suspended in RNase free water and incubated at 37°C with RNase free  
189 *DNaseI* for 30 minutes, which was then inactivated at 65°C for 10 minutes.

190           Extracted RNA was quantified, and its quality was checked using the Bio-Rad (Hercules,  
191 CA) Experion system using the Experion RNA High Sensitivity Analysis kit or the Agilent (Santa  
192 Clara, CA) 2100 Bioanalyzer system using the RNA NanoChip and Plant RNA Nano Assay Class.

### 193 *RNA sequencing and assembly*

194           RNA samples that passed the quality threshold of RIN 8.0 were sequenced at the Michigan  
195 State University Genomics Service Center for library preparation and sequencing. The Illumina  
196 Hi Seq 2000 sequencing platform (San Diego, CA) was used to sequence 2x100 PE reads from the  
197 cDNA libraries generated from the above RNA extractions, representing each cultivar, treatment,  
198 and time point. cDNA and final sequencing library molecules were generated with Illumina's  
199 TruSeq RNA Sample Preparation v2 kit (San Diego, CA) and instructions with minor  
200 modifications. Modifications to the published protocol include a decrease in the mRNA

201 fragmentation incubation time from 8 minutes to 30 seconds to create the final library proper  
202 molecule size range. Additionally, Aline Biosciences' (Woburn, MA) DNA SizeSelector-I bead-  
203 based size selection system was utilized to target final library molecules for mean size of 450 base  
204 pairs. All libraries were then quantified on a Life Technologies (Carlsbad, CA) Qubit Fluorometer  
205 and qualified on an Agilent (Santa Clara, CA) 2100 Bioanalyzer.

206         Read preprocessing and assembly were conducted in CLC Genomics Workbench (8.5.1).  
207 Briefly, RNAseq read datasets were processed with the CLC Create Sequencing QC Report tool  
208 to assess read quality. The CLC Trim Sequence process was used to trim the first 16 bases due to  
209 GC ratio variability and for a Phred score of 30. All read datasets were trimmed of ambiguous  
210 bases. Illumina reads were then processed through the CLC Merge Overlapping Pairs tool, and all  
211 reads were *de novo* assembled to produce contiguous sequences (contigs). A single master  
212 assembly was generated from the combined read data from 'Bing', 'Chelan', and 'Skeena'  
213 cultivars at each time point (Supplementary File 4). Assembled contigs passed the filter criteria of  
214 >200 base length combined with >2x average read coverage. The cultivar-specific, non-trimmed  
215 read sets were mapped back to the master assembly to generate individual read mappings for each  
216 cultivar, treatment, and time point. Read counts were normalized for each mapping group using  
217 the Reads Per Kilobase per Million reads (RPKM) method (Mortazavi et al. 2008).

### 218 *Differential expression analysis*

219         A two-pronged approach, using Kal's Z-test and the NOIseq R package, was employed to  
220 identify contigs with highest likelihood of being differentially expressed (Kal et al. 1999, Tarazona  
221 et al. 2013). Only contigs that passed established threshold filtering for both methods were  
222 considered for further analysis.

223 Genes with highest probability of being differentially expressed were first identified using  
224 the NOISeq-sim package in OmicsBox, which is designed to infer probability of differential  
225 expression by modeling pseudo replications for RNAseq experiments in which sequencing  
226 replication is absent (in this case, due to pooling of biological replicates prior to RNA extraction)  
227 (Tarazona, Furió-Tarí, Ferrer and Conesa 2013, Tarazona et al. 2011). This approach has been  
228 successfully employed for differential expression analysis in other crops, including peach and rice  
229 (Altúzar-Molina et al. 2020, De La Fuente et al. 2015). Default parameters were used to simulate  
230 five replications with a set variability of 0.2 in each replication.

231 Next, Kal's Z-tests were performed in CLC Genomics Workbench 8.5.1 to add another  
232 level of stringency to the identification of differentially expressed genes. A paired experiment  
233 comparing the read count values for ethephon treatment to control values corresponding to each  
234 cultivar was performed.

235 The final sequence selection was reduced to 3,190 contigs, which were considered to have  
236 a high probability of being differentially expressed based on conformity to all of the following  
237 criteria for at least one treatment/time: (1)  $|\log_2FC| > 1$ , (2) NOIseq probability of DE  $> 0.8$ , (3)  
238 Kal's Z-test FDR corrected p-value  $< 0.05$  (Supplementary File 5).

239

#### 240 *Functional annotation and GO enrichment analysis*

241 Assembled sweet cherry contigs were annotated using the Blast2GO feature in OmicsBox  
242 (version 1.2.4). Contigs were blasted for greatest sequence homology against the NCBI  
243 Viridiplantae database and subsequently assigned to their corresponding gene ontology (GO) terms  
244 as described previously (Götz et al. 2008, Hewitt, Ghogare, et al. 2020, Hewitt, Hendrickson, et  
245 al. 2020).

246 GO enrichment analysis using Fisher's Exact Test was also conducted in OmicsBox to  
247 identify cellular components, molecular functions, and biological processes that were over or  
248 under-represented in the ethephon treated fruit at harvest in comparison with the control fruit  
249 (Götz, García-Gómez, Terol, Williams, Nagaraj, Nueda, Robles, Talón, Dopazo and Conesa  
250 2008). Based on the differential expression analysis, for each sweet cherry cultivar, lists  
251 representing transcripts with NOIseq probability>0.8, Kal's Z-test FDR corrected p-value<0.05,  
252 and logFC>0.5 at the harvest time point were produced. These lists served as the treatment datasets  
253 for enrichment analyses, and the master annotated transcriptome was used as the reference dataset.  
254 The FDR corrected p-value cutoff for enrichment was set to 0.05. Following separate enrichment  
255 analyses for each cultivar, enriched GO terms that were shared between cultivars or unique to a  
256 single cultivar were identified using the Venn Diagram application in OmicsBox.

#### 257 *qRT-PCR Validation*

258 Targets for qRT-PCR validation were selected from a list of genes known to be involved  
259 in ethylene response and cell wall breakdown (Supplementary File 6). Primers were designed  
260 based on the near full-length transcript sequences to amplify an approximately 100-150 bp region  
261 in the 3' region of target transcripts. A bacterial luciferase gene was used as a spiked reference,  
262 with 50 ng added per reaction.

263 Library preparation, target amplification, and expression analysis were conducted in  
264 accordance with previously published methods, with minor modifications (Hendrickson et al.  
265 2019). VILO cDNA synthesis kits (Invitrogen™) were used to generate three technical replicates  
266 of cDNA for each RNA isolation per manufacturer's instructions. Replicate cDNAs were then  
267 pooled into a single sample (50 ng/ul). qRT-PCR reactions were performed using iTAQ with ROX

268 and SYBR (BioRad) and 20 $\mu$ L reactions were prepared as per the manufacturer recommendations.  
269 A total of 2 $\mu$ L of cDNA diluted to 50ng/ $\mu$ L RNA equivalents was used per reaction with 5 $\mu$ L H<sub>2</sub>O,  
270 2 $\mu$ L of each primer (10 $\mu$ M), and 10 $\mu$ L of iTAQ SYBR® Green Supermix with ROX. The qRT-  
271 PCR reactions were performed on a Stratagene MX3005 using the following parameters: 95°C 5  
272 min; 50 cycles of 95°C 30 sec, 57°C 30 sec, 72°C 30 sec; 72°C 5 min. Fluorescence readings were  
273 taken at the end of each elongation step. A melting step was performed following the cycles at  
274 95°C for 30 sec, 54°C for 30 sec and ramp up to 95°C to produce a dissociation curve.

275 To capture PCR efficiency in the data, Cq values and efficiencies were calculated for each  
276 reaction using the LinRegPCR tool (Ramakers et al. 2003, Ruijter et al. 2009). Cq values resulting  
277 from efficiencies below 1.80 or above 2.20 were judged unacceptable and were treated as  
278 unsuccessful or undetected amplifications. Cq values with efficiency values that were within  
279 expected parameters but exceeded (or equaled) 40.00 were also deemed unacceptable and  
280 disregarded in downstream analysis. In the same manner, Cq values between (35.00-39.99) were  
281 determined to be of low confidence and were marked for special consideration in downstream  
282 analysis. Fold-change expression was determined from the Cq values of all gene targets (among  
283 all replicates of all samples) among the ‘Bing’, ‘Chelan’, and ‘Skeena’ cultivars using the Pfaffl  
284 method (Pfaffl 2001). Expression values were determined with reference to the luciferase spiked  
285 gene (Supplementary File 6).

### 286 *Short variant identification*

287 The GATK best practices pipeline for short variant discovery was used to identify SNPs  
288 and indels in key, differentially expressed ethylene- and auxin-associated contigs, with minor  
289 modifications (Poplin et al. 2018, Van der Auwera et al. 2013). Briefly, a group of paired,

290 untrimmed reads from each sweet cherry cultivar was aligned to a designated reference fasta file  
291 in CLC Genomics Workbench 8.5.1. This reference file contained only the sequences for contigs  
292 that had been previously assigned GO annotations in OmicsBox. The resulting three alignments  
293 were exported as BAM files for subsequent use in the GATK pipeline. A reference fasta index and  
294 dictionary were created using Samtools and Picard software programs, respectively. Within the  
295 GATK (v. 4.1.7.0) suite, the HaplotypeCaller tool was used to identify variants between parental  
296 haplotypes for each cultivar; the results from all three cultivars were then merged into a single  
297 GVCF file using the CombineGVCFs tool. Finally, The GenotypeGVCFs tool was used to perform  
298 joint genotyping on the GVCF file containing variant information for each cherry cultivar, and the  
299 results were visualized in Integrative Genomics Viewer (v. 2.8.2).

## 300 **Results and Discussion**

### 301 *Pediceal-Fruit Retention Force*

302 The PFRF values of control fruits decreased naturally over time, with reductions of 75.5%,  
303 74.0%, and 37.5% observed for ‘Skeena’, ‘Bing’, and ‘Chelan,’ respectively. Application of  
304 ethephon at approximately 80% of final fruit size for the three cultivars decreased mean PFRF  
305 value in comparison with the respective controls, but whether this decrease was significant and  
306 resulted in the achievement of the threshold for mechanical harvesting varied across cultivars  
307 (Figure 1).

308 In ‘Skeena’, mean PFRF for both control and treatment fruit dropped below the 0.40kg-  
309 force (3.92N) threshold for mechanical harvesting, reaching final mean PFRF values of 0.29kg-  
310 force (2.84N) and 0.156kg-force (1.53N), respectively (Figure 1). These findings indicate that

311 while ‘Skeena’ is capable of natural abscission, ethephon application does significantly increase  
312 the AZ formation response, causing PFRF values to decrease significantly compared to control  
313 fruit by full fruit maturation.

314 Similarly, for ‘Bing’, mean PFRF for both control and treatment groups decreased over  
315 time; however, a mean PFRF conducive to mechanical harvesting was only achieved in the  
316 ethephon treated fruit, which reached a final PFRF value of 0.215kg-force (2.11N), significantly  
317 lower than the control value of 0.418kg-force (4.1N) (Figure 1). This suggests that the inducibility  
318 of ‘Bing’ is resultant of a similar, yet less dramatic, natural decrease in PFRF that is enhanced by  
319 ethephon treatment.

320 ‘Chelan’ exhibited a statistically significant PFRF response at the time of harvest in the  
321 ethephon treated fruit in comparison with the control; however, the final PFRF of 0.832kg-force  
322 (8.16N) of the treatment group was not reduced to the threshold required for efficient mechanical  
323 harvesting (Figure 1). These physiological results support the observations that ‘Chelan’ forms  
324 neither a developmental nor an ethylene-induced PFAZ (Smith and Whiting 2010). However,  
325 given these findings and the trends of decreased PFRF observed in the treatment and control groups  
326 from each cultivar, there may be potential for induction of ‘Chelan’ abscission with the appropriate  
327 chemical targeting strategy aided by the gene expression results.

### 328 *Transcriptome assembly and annotation*

329 The transcriptome assembly resulted in the generation of 82,587 contigs from  
330 1,061,563,488 total trimmed reads. Contigs were subsequently filtered for >200 base length and  
331 >2x coverage, for a final total of 81,852 contigs for downstream processing (Supplementary File



332 4). Functional annotation conducted using the OmicsBox genomics suite resulted in the assignation  
333 of annotations to a total of 30,946 (37.8%) contigs (Supplementary File 7).

334

### 335 *Differential Expression of Ethylene-associated Contigs*

336 The basis for the inducibility of PFAZ formation in ‘Bing’ during fruit development is  
337 evident at the genetic level with respect to expression of ethylene biosynthesis, signaling, and  
338 responsive elements in the transcriptome. Moreover, the results of short variant analysis lend a  
339 complementary insight regarding the basis for cultivar-specific differences in expression of  
340 ethylene-associated contigs.

341 At both the 0-hour time point and at harvest, in ‘Bing’, a transcript encoding the rate-  
342 limiting ethylene biosynthetic enzyme 1-aminocyclopropane-1-carboxylate oxidase 1 (ACO1) was  
343 highly elevated in expression, as was a transcript encoding ethylene receptor 2 (ETR2), a key gene  
344 involved in ethylene perception. In contrast, ‘Skeena’ and ‘Chelan’ displayed basal levels of  
345 expression of ACO1 and ETR2, suggestive of minimal ethylene response during abscission zone  
346 development (Figure 2).

347 Transmission of ethylene-activated signal to the nucleus involves ethylene-insensitive 2  
348 (EIN2) and ethylene insensitive 2-like (EIL) family proteins. Upon activation of ETRs by ethylene,  
349 the C-terminal domain of EIN2 is cleaved and translocated to the nucleus where it activates  
350 transcription of ethylene-responsive factors (ERFs) involved in the regulation of downstream  
351 ripening responses (Liu et al. 2015; Chen et al. 2018). Numerous transcripts encoding ERFs were  
352 identified, which were differentially expressed in at least one cultivar and time point. Consistent  
353 with the aforementioned results, a majority of these contigs were highly induced in ‘Bing’  
354 following ethephon treatment. In particular, contigs encoding ERF1B, ERF1B-like, and ERF109-

355 like were highly differentially expressed in ‘Bing’ 6 hours following ethephon treatment, and also  
356 at harvest; however, these genes did not change significantly in expression in ‘Chelan’ or ‘Skeena’  
357 (Figure 3).

358         The dramatically heightened expression of ethylene biosynthesis, perception, signaling,  
359 and responsive genes in ‘Bing’ in comparison with ‘Skeena’ and ‘Chelan’ suggests the presence  
360 of cultivar-specific differences in either the coding sequences or in cis-regulatory components of  
361 ethylene-associated genes. Previously, a study investigating polymorphisms in the sweet cherry  
362 cultivar ‘Stella’ identified several missense mutations in ethylene biosynthetic ACS and ACO  
363 genes, and it was hypothesized that such mutations may alter the non-climacteric ripening profile  
364 with regards to ethylene response (Koepke et al., 2013). In this study, variant calling with GATK  
365 revealed several SNPs and indels in the ORFs and/or 5’ UTR of contigs corresponding to ACO1  
366 and ETR2, and EIN2 (Table 1). Interestingly, two SNPs unique to ‘Bing’ ACO1 correspond to  
367 non-synonymous mutations, imparting changes in the amino acid sequence and thereby likely  
368 affecting protein function (Table 1). Taken together with the expression results, these findings  
369 may explain the differential ethylene responses between cultivars, as well as the unique inducible  
370 abscission phenotype of ‘Bing’.

### 371 *Differential Expression of Auxin-associated Contigs*

372         In addition to the differential ethylene responses, the ethephon-treated ‘Chelan’, ‘Bing’,  
373 and ‘Skeena’ PFAZ tissues displayed a differential reduction in the expression of auxin-responsive  
374 genes in comparison to their respective controls. This suggests that the response to auxin and/or  
375 reduction in auxin transport, was inhibited in the presence of exogenously applied ethylene.

376         Auxin-responsive transcription factors IAA11, IAA13, and IAA27, auxin transport  
377 facilitator WALLS ARE THIN 1 (WAT1), and Auxin Efflux Carrier (AEC) component 1c

378 displayed comparatively low expression in ‘Skeena’, intermediate expression in ‘Bing’, and higher  
379 expression in ‘Chelan’ control PFAZ tissues at harvest. Ethephon treatment attenuated this  
380 expression in PFAZ tissue for all three cultivars, but the same relative expression trend was  
381 maintained. WAT1, IAA13, IAA27, and IAA11 displayed decreased expression at harvest in all  
382 ethephon-treated cultivars in comparison with their respective controls. Interestingly, ‘Chelan’  
383 displayed a natural increase in the expression of these transcripts from Day 0 to harvest, which  
384 was inhibited and reversed by the application of ethephon (Figure 4). For both ‘Bing’ and  
385 ‘Skeena’, the same transcripts naturally decreased in abundance over time—a decrease that was  
386 accelerated in the presence of ethephon.

387 Variant calling using the GATK pipeline revealed several SNPs and indels in the ORFs of  
388 IAA27, WAT1, and AEC 1b. In the case of IAA, a single base insertion at the end of the coding  
389 sequence in ‘Bing’ and ‘Skeena’ results in a change of the penultimate codon (and corresponding  
390 amino acid) and the premature introduction of a stop codon, leading to a one-residue truncation of  
391 the entire protein. Furthermore, in dAEC1b, a SNP was identified that imparts a single amino acid  
392 substitution only in ‘Chelan’. In addition to the results of the expression analysis, these  
393 polymorphic regions within contigs corresponding to key auxin-associated genes may partially  
394 explain differential auxin responses among the three cultivars. Previously, it was demonstrated  
395 that the turnover of IAA/Aux family proteins is necessary for auxin response (Han and Hwang  
396 2018, Reed 2001). Furthermore, the protein encoded by WAT1 is required for secondary cell wall  
397 formation as well as facilitation of vacuolar auxin transport, and increased expression of WAT1  
398 has been shown to correlate with increased auxin mobilization and release of free IAA from  
399 vacuolar storage (Ranocha et al. 2010, Ranocha et al. 2011, Ranocha et al. 2013).

400 While free auxin was not measured in this study, differences in the abundance of auxin-  
401 responsive and auxin mobilization-associated transcripts in the three sweet cherry cultivars over  
402 time lends to extrapolation of information regarding cultivar-specific, endogenous free IAA  
403 concentrations. If free auxin levels are high, abundance and/or activity of auxin-responsive protein  
404 encoding transcripts (ARFs, IAAs) is expected to be higher to accommodate them. ‘Skeena’ does  
405 not require ethylene for abscission; however, ethephon application appeared to further offset the  
406 auxin to ethylene ratios, in favor of ethylene, to accelerate abscission in this cultivar. The ability  
407 of ‘Skeena’ to auto-abscise suggests that endogenous accumulation of free auxin at the site of  
408 abscission may be naturally lower in this cultivar than it is for ‘Bing’ and ‘Chelan’. Conversely,  
409 the comparatively higher expression of transcripts associated with auxin response and movement  
410 proteins in ‘Chelan’ is suggestive of a naturally higher level of endogenous IAA. While the current  
411 industrial standard levels of ethephon application were insufficient to reduce the PFRF of ‘Chelan’  
412 fruit to the threshold required for mechanical harvesting, both PFRF and auxin-associated  
413 transcript abundance in ‘Chelan’ did decrease as a result of ethephon application. It has been shown  
414 that ethephon application rates as high as  $5.8 \text{ L ha}^{-1}$  remain insufficient to induce a reduction of  
415 ‘Chelan’ PFRF values to the threshold for mechanical harvest (Smith and Whiting 2010). An early  
416 study found that a high application rate of 500 ppm ( $7.8 \text{ L ha}^{-1}$  [ $6.7 \text{ pt A}^{-1}$ ]), ethephon begins to  
417 deleteriously affect some sweet cherry cultivars by inducing unwanted leaf abscission and terminal  
418 shoot necrosis, although it is not reported to what extent ‘Chelan’ is impacted by such a  
419 concentration (Bukovac et al. 1971, Smith and Whiting 2010). Considering the present results  
420 alongside the insight gained from previous work, it is possible that mechanical abscission of  
421 ‘Chelan’ could be achieved through a combination of a slightly higher ethephon application rate  
422 and application of auxin inhibitors, the latter of which could further shift the ethylene/auxin ratio

423 in a manner favorable to abscission while reducing the need for excessively high and potentially  
424 phytotoxic ethephon application rates.

425 'Bing' PFAZ tissues displayed an abundance of auxin-associated transcripts intermediate  
426 to that of 'Skeena' and 'Chelan'. Following ethephon treatment, the phenotypic observations of  
427 inducible abscission were supported at the gene expression level; with the responses greatly  
428 attenuated to lower than those of 'Skeena' ethephon treated and control PFAZ tissues.

#### 429 *qRT-PCR validation*

430 qRT-PCR analysis of 10 ethylene-responsive/abscission-related genes resulted in 70%  
431 correspondence of general expression trends for 'Bing' and 'Chelan' and an 80% correspondence  
432 for 'Skeena'. Validated transcripts whose qRT-PCR expression pattern (fold change calculated  
433 using the  $2^{-(\Delta\Delta Ct)}$  method) was consistent with that of the RNAseq-based expression  
434 (ethephon/control RPKM ratio) included genes associated with ethylene biosynthesis (ACS1 and  
435 ACO1), perception (ETR2), and response (ERF1B-like, ERF027-like, and WRKY1), as well as  
436 cell wall breakdown-associated polygalacturonase (PG) (Supplementary File 6).

#### 437 *Gene Ontology Enrichment Analysis*

438 GO enrichment analysis, followed by filtering for most specific ontologies using the FDR-  
439 corrected p-value cutoff of 0.05, resulted in the identification of two enriched GOs for 'Skeena',  
440 seven for 'Bing', and 21 for 'Chelan'. Of these enriched terms, 15 were unique to 'Chelan', one  
441 was unique to 'Bing', and none were unique to 'Skeena'.

442 A single enriched GO term, 'integral component of membrane', was shared among all three  
443 cultivars. Differentially expressed genes associated with this term include cell wall and integrity-

444 associated patatin-like protein 2 (PLP2), which plays a role in programmed cell death, and WAT1,  
445 which, in addition to its role in auxin mobilization, plays a role in secondary cell wall formation  
446 and stability (Camera et al. 2009, Ranocha, Dima, Felten, Freydier, Hoffmann, Ljung, Lacombe,  
447 Corratgé, Thibaud and Sundberg 2011). As all three cultivars undergo a decrease in PFRF  
448 following application of ethephon, it is logical that biological processes, molecular functions, and  
449 cellular components associated with membrane and cell wall integrity are affected (Figure 5).

450 A single GO term, ‘response to stress’, was shared between ‘Skeena’ and ‘Chelan’, but was  
451 not enriched in ‘Bing’ (Figure 5). Based on this observation, it is plausible that ‘Bing’ has a lower  
452 propensity to respond to and/or counteract the metabolically disruptive effects of ethephon (which  
453 is expected to trigger ethylene-associated stress responses), and is therefore affected to a greater  
454 degree than the other two cultivars, specifically with respect to induction of PFAZ formation.  
455 Furthermore, it is possible that exogenous ethylene elicits a signal transduction response upstream  
456 of abscission only in ‘Bing’, whereas the other cultivars may only perceive the exogenous ethylene  
457 as environmental stress.

458 Interestingly, the GO term ‘lateral root formation’ was the only ontology that was uniquely  
459 enriched for ‘Bing’ (Figure 5). One of the differentially expressed genes associated with this term  
460 was the *lateral boundary domain containing protein 18 (LOB18)*, which has previously been  
461 implicated in boundary formation during root development. It is possible that this gene, or  
462 additional members of the LOB gene family, plays a role in boundary formation at the PFAZ  
463 (Majer and Hochholdinger 2011). In addition to LOB18, a differentially expressed transcript  
464 corresponding to receptor-like protein kinase HAESA-LIKE 1 (HSL1), is also associated with the  
465 ‘lateral root formation’ ontology, and mutation of HSL1 has been shown to impede floral and leaf

466 abscission in Arabidopsis (Niederhuth et al. 2013, Taylor and Walker 2018). The differential  
467 expression of both LOB18 and HSL1 may underlie the ability to induce abscission in ‘Bing’  
468 through boundary formation and promotion of abscission-associated processes.

469 GO terms shared between ‘Bing’ and ‘Chelan’, but not enriched in ‘Skeena’, included  
470 ‘auxin-activated signaling pathway’, ‘growth factor activity’, ‘plasma membrane’, ‘extracellular  
471 region’ and ‘heme binding’ (Figure 6). Consistent with the results of the expression analysis, it  
472 appears that a greater degree of auxin response is present in these cultivars in comparison with  
473 ‘Skeena’.

474 The most recalcitrant of the three cultivars to abscission zone formation, ‘Chelan’, had a  
475 disproportionately high number of unique, enriched GO terms in comparison with the other  
476 cultivars. A majority of these terms were associated with maintaining or regulating homeostasis  
477 at the cellular, metabolic, and molecular levels, including: ‘biological regulation’, ‘chemical  
478 homeostasis’, ‘maintenance of location’, ‘maintenance of location in cell’, ‘regulation of gene  
479 expression’, ‘regulation of cellular biosynthetic process’, and ‘regulation of biosynthetic process’.  
480 Additional terms included: ‘cellular response to auxin stimulus’, ‘cell-cell junction’, ‘cell  
481 communication’, ‘binding’, and ‘plant organ development’ (Figure 5). The high number and nature  
482 of these unique, enriched terms is unlikely coincidental. ‘Chelan’ appears to have biological  
483 networks in place for maintenance and regulation of inter- and intracellular homeostasis, which  
484 may extend to the tissue or organ level, in the presence of external perturbation of the system by  
485 ethephon. The overall nature of the enriched ontologies unique to ‘Chelan’ suggests that there is  
486 also a high degree of coordination of cellular communication and response to stimuli, specifically  
487 to auxin. The gene expression results lend insight into genetic and metabolic targets by which

488 ‘Chelan’ and other non-abscising cultivars may be induced to abscise through appropriate  
489 chemical targeting of phytohormone pathways or, potentially, through genome editing of the  
490 identified ethylene- and auxin-associated genes involved in the abscission process.

## 491 **Conclusions**

492 This study investigated the changes in PFRF, gene expression changes, and implied  
493 biological processes underlying PFAZ formation in sweet cherry. The results provide a  
494 transcriptomic insight regarding the gene expression-level effects of exogenous ethylene  
495 application on the abscission phenotype and PFAZ development, which can be utilized by the  
496 industry to customize harvest strategies.

497 Consistent with previous work, PFAZ formation was observed to occur in a cultivar-  
498 specific manner, and the abscission phenotype of each cultivar was affected to a different degree  
499 by exogenous application of ethylene. Observation of unique, heightened expression of ethylene  
500 biosynthesis, perception, signaling, and response genes in ‘Bing’ following ethephon application  
501 and at harvest parallels the decrease in PFRF and may be partially responsible for the inducibility  
502 of abscission in this cultivar. Furthermore, the results of this study point towards a potential genetic  
503 basis for the inducible abscission response in ‘Bing’, with polymorphisms identified in key  
504 ethylene- and auxin-associated genes. The auto-abscission phenotype of ‘Skeena’ may result from  
505 naturally lower levels of free auxin, as evidenced by the low abundance of IAA/ARF-associated  
506 transcripts in comparison with ‘Bing’ and ‘Chelan’. Furthermore, ‘Skeena’ exhibited fewer  
507 significant gene expression changes than the other cultivars following ethephon application, which  
508 corresponded to fewer enriched ontologies, suggesting that ‘Skeena’ may have a reduced capacity  
509 for homeostatic maintenance in light of perturbation by ethephon application. In ‘Chelan’,  
510 comparatively high abundance IAA/ARF-associated transcripts in control fruit, that was



511 attenuated following ethephon treatment, may indicate higher levels of endogenous free auxin.  
512 The increased capacity for auxin mobilization, indicated by IAA/ARF expression, antagonizes the  
513 abscission-promoting effects of exogenous ethylene. Furthermore, ‘Chelan’ exhibited the highest  
514 number of unique enriched gene ontologies, most of which were related to the maintenance of  
515 metabolic homeostasis. Taken together, these observations, along with the PFRF results, provide  
516 insight regarding the recalcitrance of ‘Chelan’ fruit to abscise at the pedicel-fruit junction.

517 Identification of cultivar-specific, differentially expressed genes and enriched GO terms  
518 involved in abscission, as well as ontologies that are shared across cultivars, provides information  
519 that will inform future efforts to promote controlled, timely abscission of sweet cherries. This, in  
520 turn, will lead to the improvement and standardization of mechanical harvesting, thereby  
521 improving efficiency and increasing the economic profitability of the sweet cherry industry.  
522 Ultimately, the outcomes of this work may be extended to other crops where planned abscission  
523 can be useful in managing the harvest.

## 524 **Acknowledgments**

525 This study was supported by a USDA Special Crop Research Initiative (SCRI) program grant  
526 (Project No. 2009-02559) to MW and AD. Work in the Dhingra lab was supported in part by  
527 Washington State University Agriculture Center Research Hatch Grant WNP00011. SLH, BK,  
528 and TK acknowledge the support received from ARCS Seattle Chapter and National Institute of  
529 Health/National Institute of General Medical Sciences through an institutional training grant award  
530 T32-GM008336. The contents of this work are solely the responsibility of the authors and do not  
531 necessarily represent the official views of the NIGMS or NIH. The authors thank Dr. Richard  
532 Sharpe for assistance with qRT-PCR assays and analysis.

533 **Author Contributions**

534 SH – Transcriptome assembly, data analysis, manuscript preparation, and editing

535 BK – Experimental design, data analysis, manuscript preparation

536 TK – Experimental design, PFRF, and tissue collection

537 JA – Assisted with ethephon treatment and collection of PFRF data and tissue collection

538 MW – Experimental design, guidance on application of ethephon and tissue collection

539 AD – Conceived the study, experimental design, data analysis, manuscript preparation and editing.

540 **Competing Interest**

541 The authors declare no competing interests, or other interests that might be perceived to influence

542 the results and/or discussion reported in this paper.

543

544

545

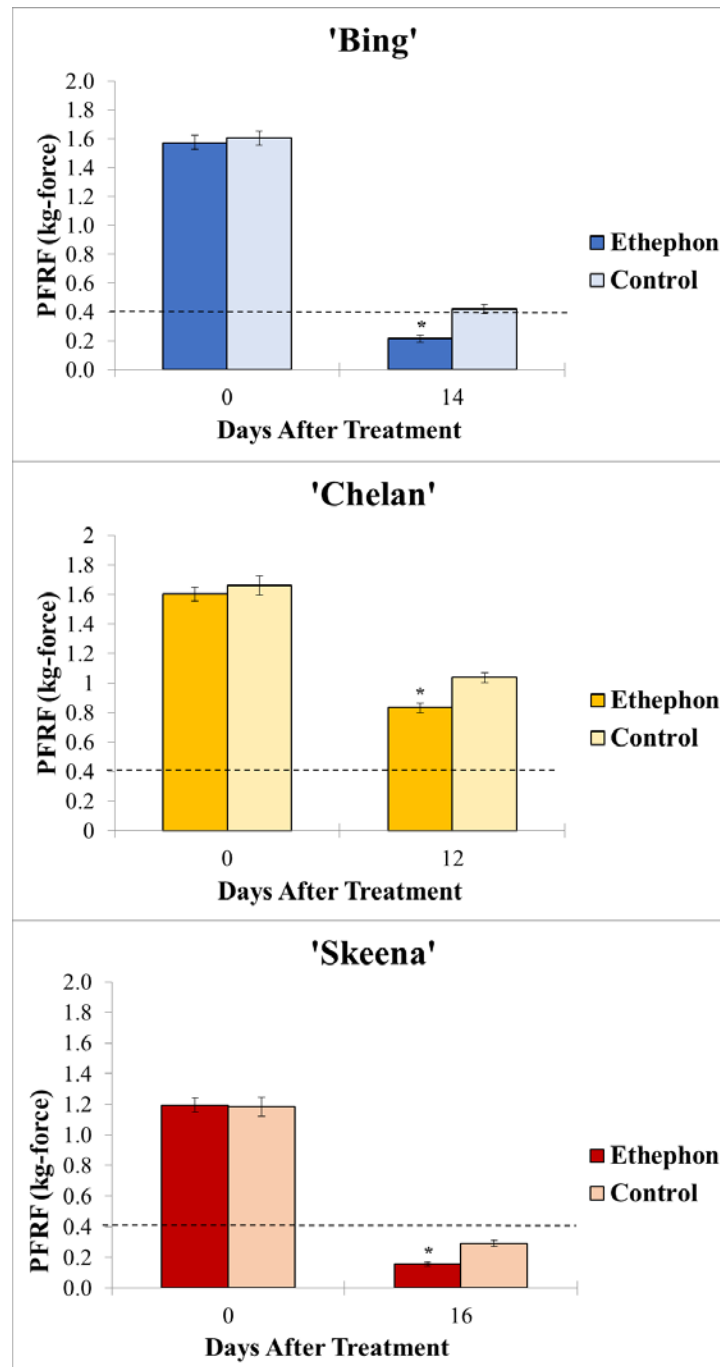

**Figure 1.** Endpoint mean control and ethephon-treatment PFRF values for (A) 'Bing' (B) 'Chelan', and (C) 'Skeena' PFAZ tissues. The dotted line represents the threshold PFRF for mechanical harvest. Asterisks indicate significant difference between ethephon-treated and control fruit at harvest ( $p < 0.05$ ).

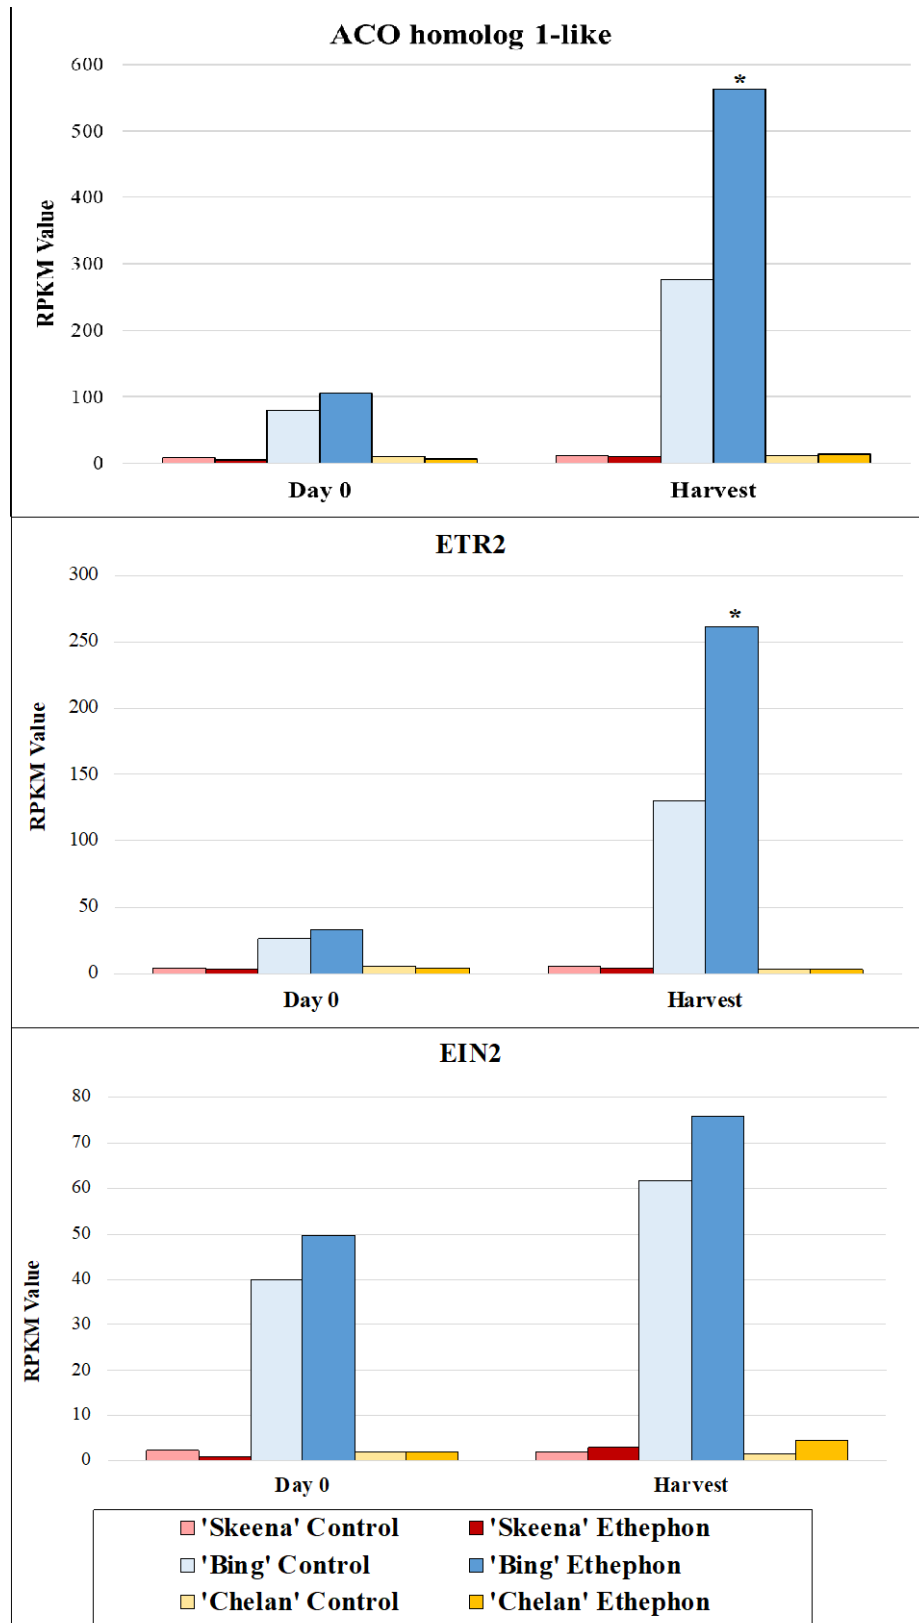

**Figure 2.** Expression patterns of ethylene biosynthesis gene 1-aminocyclopropane-1-carboxylate oxidase 1 (ACO1), ethylene receptor 2 (ETR2), and signal transducer ethylene insensitive 2 (EIN2) at Day 0 (0-hour) and at harvest. Asterisks indicate significant difference between ethephon-treated versus control fruit according to both Kal's Z-test and NOIseq differential expression probability analysis.

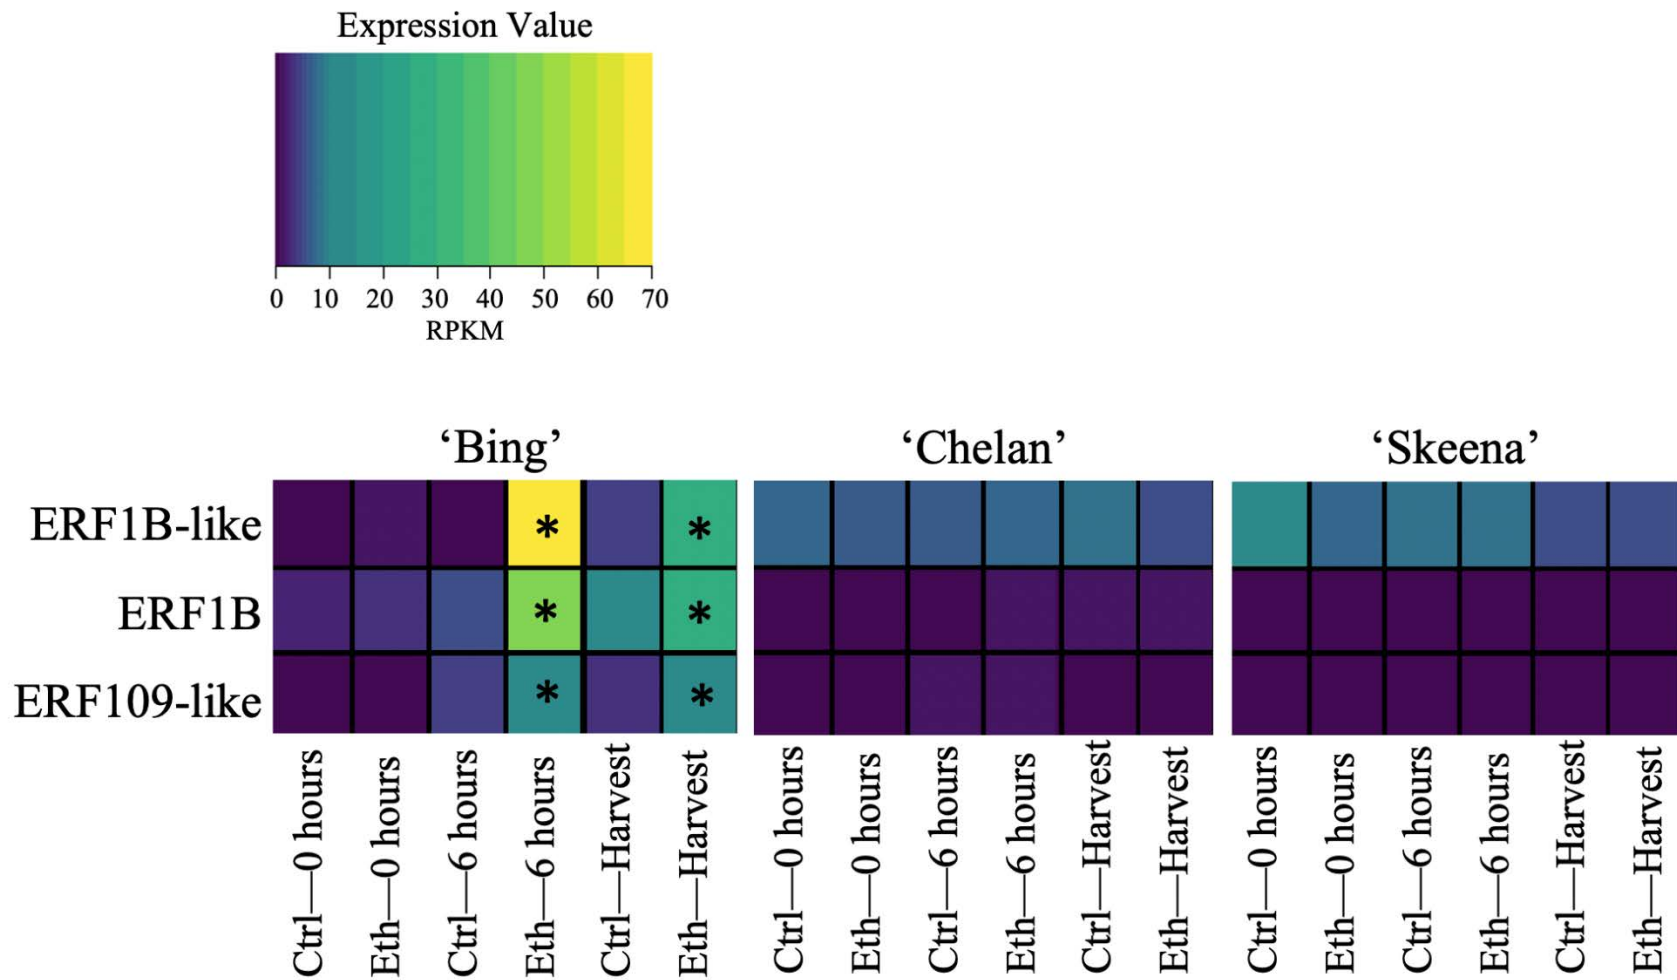

**Figure 3.** Heatmap displaying normalized expression values (RPKM) of three ethylene responsive transcription factor-encoding contigs displaying differential expression for at least one cultivar and timepoint. Expression was measured at 0 hours, 6 hours, and at harvest

for 'Bing', 'Chelan', and 'Skeena' cultivars. Asterisk indicates differential expression (Kal's Z-test FDR-corrected p-value <0.05, NOISeq DE probability>0.8, |LOG<sub>2</sub>FC|>1). Inducibility of 'Bing' abscission may lie in allelic difference in ERFs, as evidenced by cultivar-specific inducibility of expression ERF1B-like, ERF1B, and ERF109-like genes. Expression for 'Skeena' and 'Chelan' remained low, regardless of time point and treatment.

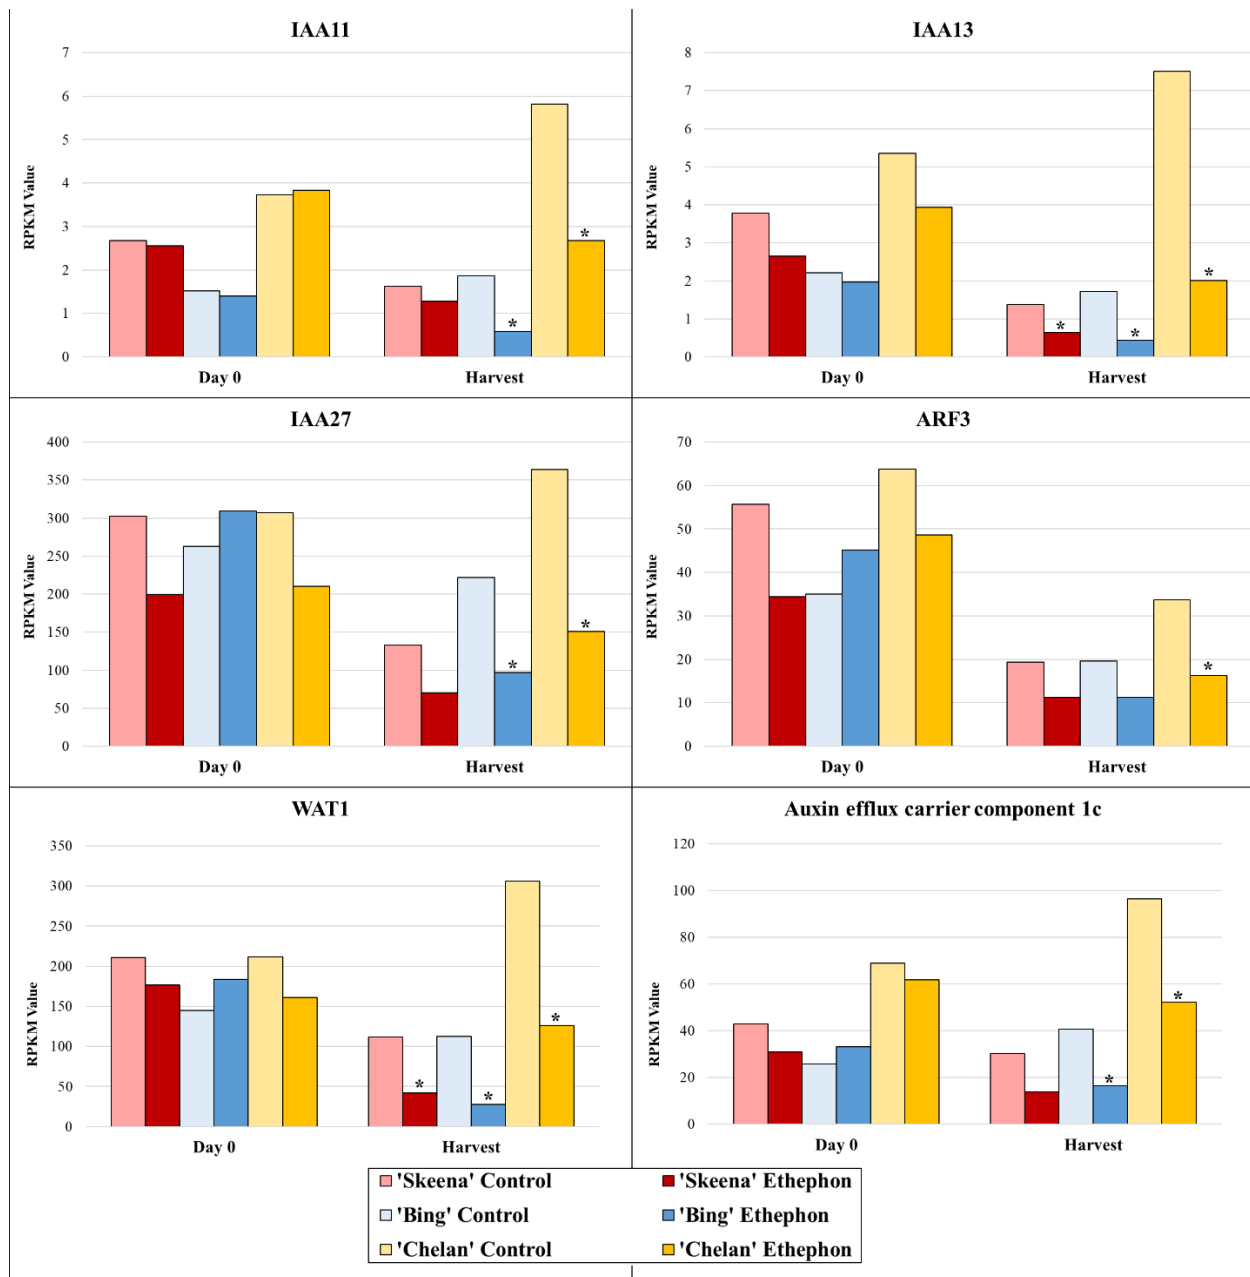

**Figure 4.** Expression patterns of auxin-associated genes at Day 0 (0-hour) and at harvest. Asterisks indicate significant difference according to both Kal's Z-test and NOIseq differential expression probability analysis. A shared expression pattern was observed for auxin-associated genes at harvest. Auxin responsive transcription factors IAA11, IAA13, and IAA27, auxin transport facilitator WALLS ARE THIN 1 (WAT1), and auxin efflux carrier component 1c displayed



comparatively lower expression in ‘Skeena’, intermediate expression in ‘Bing’, and higher expression in ‘Chelan’ control at harvest. Following ethephon treatment, expression was attenuated in all three cultivars, however the same relative expression trend was maintained, with ‘Skeena’ ethephon-treated fruit exhibiting lowest expression at harvest and ‘Chelan’ ethephon-treated fruit displaying the highest expression at harvest.

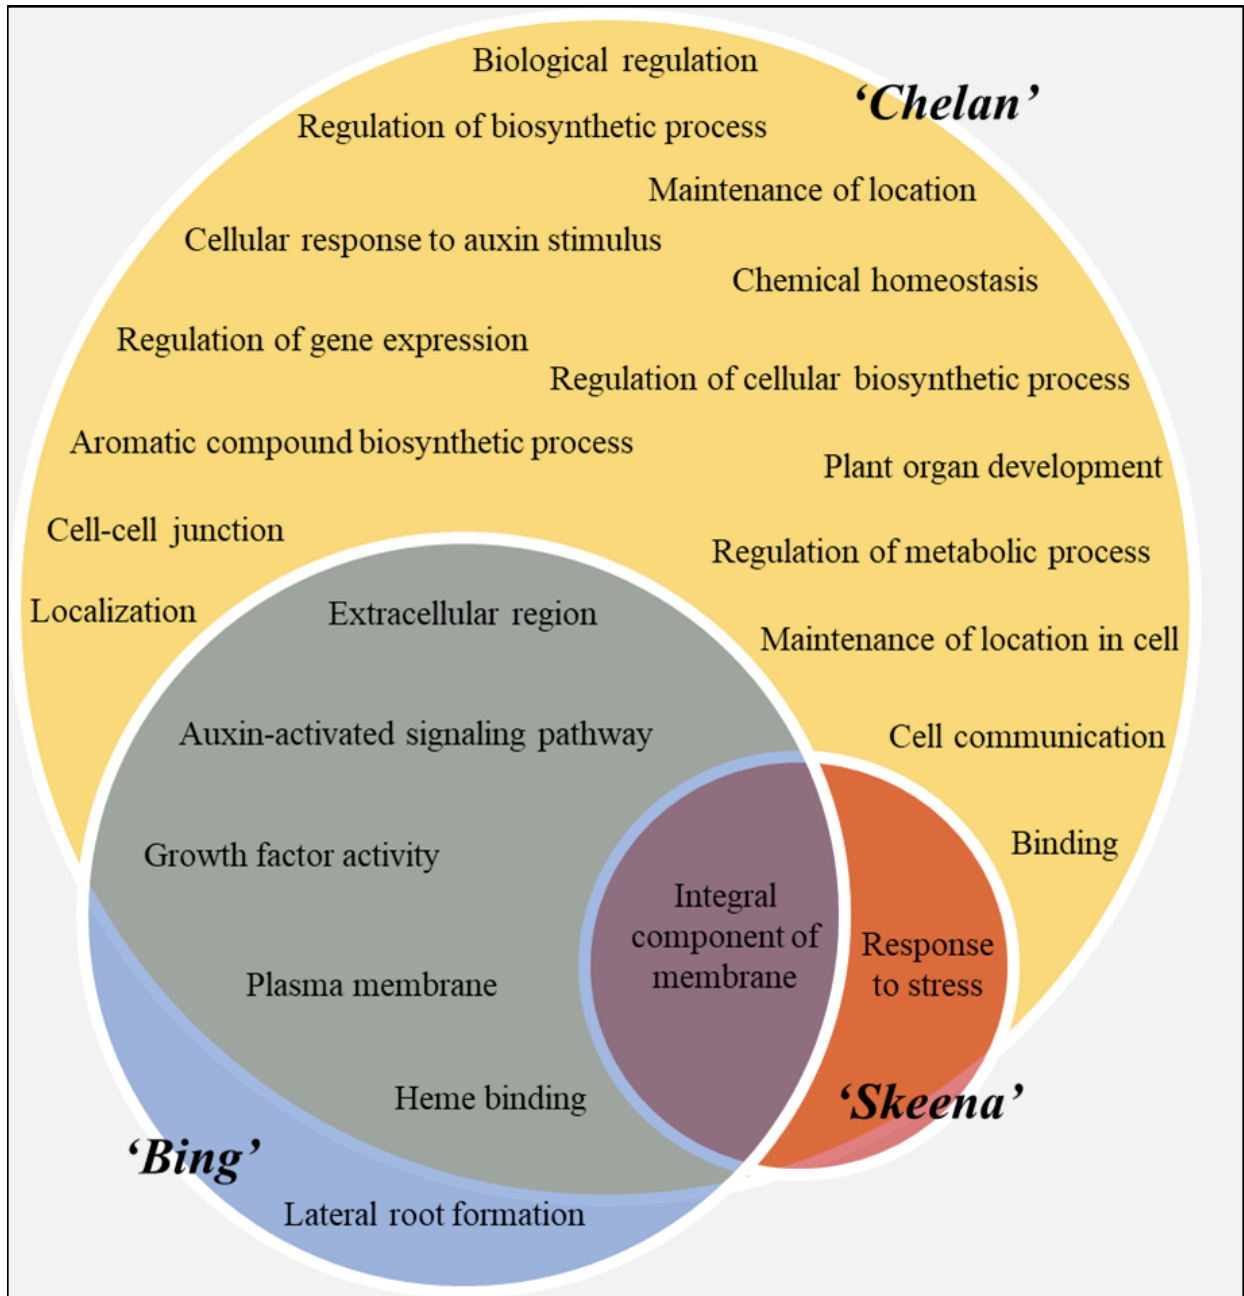

**Figure 5.** Shared and unique enriched GO terms in ethephon-treated 'Bing', 'Chelan', and 'Skeena' fruit at harvest versus control fruit at harvest. Enrichment results are based on Fisher's Exact test with an FDR corrected p-value <0.05.

**Table 1.** Variants identified in key, differentially expressed ethylene and auxin-associated genes. The GATK RNAseq short variant discovery pipeline was used for characterization of SNPs and indels (Poplin, Ruano-Rubio, DePristo, Fennell, Carneiro, Van der Auwera, Kling, Gauthier, Levy-Moonshine, Roazen, Shakir, Thibault, Chandran, Whelan, Lek, Gabriel, Daly, Neale, MacArthur and Banks 2018).

| Gene                                                    | Translated Protein Length (residues) | Variant Residue Number (CDS) or Sequence Location (UTR) | Variant Type                                                       | Amino Acid/ ORF change                                       | Genotype                        |                                 |                                 |
|---------------------------------------------------------|--------------------------------------|---------------------------------------------------------|--------------------------------------------------------------------|--------------------------------------------------------------|---------------------------------|---------------------------------|---------------------------------|
|                                                         |                                      |                                                         |                                                                    |                                                              | Bing                            | Chelan                          | Skeena                          |
| <i>ACO1</i><br>Contig 5131<br>(1562 bp)                 | 376                                  | 114<br>63<br>49<br>5' UTR (-15 bp)<br>5' UTR (-99 bp)   | SNP, A-->T<br>SNP, C-->T<br>SNP, A-->G<br>SNP, A-->G<br>SNP, T-->C | Val-->Asp<br>None, Synonymous Leu<br>Ser-->Pro<br>N/A<br>N/A | A/T<br>C/T<br>A/G<br>A/G<br>T/C | A/A<br>C/C<br>A/A<br>A/A<br>T/C | A/A<br>C/C<br>A/A<br>A/A<br>T/T |
| <i>ETR2</i><br>Contig 6010<br>(3113 bp)                 | 764                                  | 5' UTR (-331 bp)                                        | Indel, T-->TA                                                      | N/A                                                          | T/T                             | T/TA                            | T/TA                            |
| <i>EIN2</i><br>Contig 2549<br>(2771 bp)                 | 576                                  | 5' UTR (-99 bp)                                         | SNP, C-->A                                                         | N/A                                                          | C/A                             | C/C                             | C/A                             |
| <i>IAA27</i><br>Contig 864<br>(2374 bp)                 | 319                                  | 318<br>144                                              | Indel, C-->CT<br>SNP, T-->C                                        | Ser-Asn-Stop-->Lys-Stop<br>None, Synonymous Ala              | C/CT<br>T/C                     | C/C<br>T/C                      | C/CT<br>T/T                     |
| <i>WAT1</i><br>Contig 1306<br>(1902 bp)                 | 406                                  | 3' UTR (+75 bp)<br>324<br>241                           | Indel, C-->CT<br>SNP, G-->C<br>SNP, C-->T                          | N/A<br>None, Synonymous Val<br>None, Synonymous Lys          | C/CT<br>G/C<br>C/T              | C/C<br>G/G<br>C/C               | C/C<br>G/G<br>C/T               |
| <i>Auxin Efflux Carrier</i><br>Contig 2503<br>(1568 bp) | 249                                  | 95<br>142                                               | SNP, A-->G<br>SNP, C-->A                                           | Asp-->His<br>None, Synonymous Gly                            | A/A<br>C/C                      | A/G<br>C/A                      | A/A<br>C/C                      |

**Supplementary File 1.** Ethephon treatment and sampling timeline

**Supplementary File 2.** PFAZ data from 2010, 2013, and 2014 seasons

**Supplementary File 3.** Picture of fruit section sampled for PFAZ analysis

**Supplementary File 4.** Cherry assembly fasta file

**Supplementary File 5.** Spreadsheet with RPKM values of contigs that passed stringent statistical and probability filters for differential expression based on Kal's Z-test and NOIseq analysis.

**Supplementary File 6.** qRT-PCR primers; Cq values and fold change expression summary by template

**Supplementary File 7.** List of all annotated contigs >2x coverage and >200bp in length

## References

- Ali T, Subramanian J, Peter K P. 2012. Ethephon-Induced Abscission of “Redhaven” Peach. American Journal of Plant Sciences.2012.
- Altúzar-Molina A, Lozano L, Ortíz-Berrocal M, Ramírez M, Martínez L, de Lourdes Velázquez-Hernández M, Dhar-Ray S, Silvente S, Mariano N, Shishkova S. 2020. Expression of the Legume-Specific Nod Factor Receptor Proteins Alters Developmental and Immune Responses in Rice. Plant Molecular Biology Reporter.1-20.
- Axe SSA, Bush KG. 2017. 1.2 Global Sweet Cherry Production. Cherries: Botany, Production and Uses.76:2.
- Blando F, Oomah BD. 2019. Sweet and sour cherries: Origin, distribution, nutritional composition and health benefits. Trends Food Sci Technol.
- Blanusa T, Else MA, Atkinson CJ, Davies WJ. 2005. The regulation of sweet cherry fruit abscission by polar auxin transport. Plant growth regulation.45:189-198.
- Botton A, Eccher G, Forcato C, Ferrarini A, Begheldo M, Zermiani M, Moscatello S, Battistelli A, Velasco R, Ruperti B. 2011. Signaling pathways mediating the induction of apple fruitlet abscission. Plant physiology.155:185-208.
- Bukovac M, Zucconi F, Wittenbach V, Flore J, Inoue H. 1971. Effects of (2-chloroethyl) phosphonic acid on development and abscission of maturing sweet cherry (*Prunus avium* L.) fruit. Amer Soc Hort Sci J.
- Camera SL, Balagué C, Göbel C, Geoffroy P, Legrand M, Feussner I, Roby D, Heitz T. 2009. The Arabidopsis patatin-like protein 2 (PLP2) plays an essential role in cell death execution and differentially affects biosynthesis of oxylipins and resistance to pathogens. Mol Plant-Microbe Interact.22:469-481.

Chomczynski P, Sacchi N. 1987. Single-step method of RNA isolation by acid guanidinium thiocyanate-phenol-chloroform extraction. *Anal Biochem.*162:156-159.

De La Fuente L, Conesa A, Lloret A, Badenes ML, Ríos G. 2015. Genome-wide changes in histone H3 lysine 27 trimethylation associated with bud dormancy release in peach. *Tree Genetics & Genomes.*11:45.

Else MA, Stankiewicz-Davies AP, Crisp CM, Atkinson CJ. 2004. The role of polar auxin transport through pedicels of *Prunus avium* L. in relation to fruit development and retention. *J Exp Bot.*55:2099-2109.

Gil-Amado JA, Gomez-Jimenez MC. 2013. Transcriptome analysis of mature fruit abscission control in olive. *Plant and Cell Physiology.*54:244-269.

Götz S, García-Gómez JM, Terol J, Williams TD, Nagaraj SH, Nueda MJ, Robles M, Talón M, Dopazo J, Conesa A. 2008. High-throughput functional annotation and data mining with the Blast2GO suite. *Nucleic Acids Res.*36:3420-3435.

Han S, Hwang I. 2018. Integration of multiple signaling pathways shapes the auxin response. *J Exp Bot.*69:189-200.

Hendrickson C, Hewitt S, Swanson ME, Einhorn T, Dhingra A. 2019. Evidence for pre-climacteric activation of AOX transcription during cold-induced conditioning to ripen in European pear (*Pyrus communis* L.). *PloS one.*14:e0225886.

Hewitt SL, Ghogare R, Dhingra A. 2020. Glyoxylic acid overcomes 1-MCP-induced blockage of fruit ripening in *Pyrus communis* L. var. 'D'Anjou'. *Scientific Reports.*10:1-14.

Hewitt SL, Hendrickson CA, Dhingra A. 2020. evidence for the involvement of Vernalization-related Genes in the Regulation of cold-induced Ripening in 'D'Anjou' and 'Bartlett' pear fruit. *Scientific reports.*10:1-14.

- Hiwasa-Tanase K, Ezura H. 2014. Climacteric and non-climacteric ripening. *Fruit Ripening, Physiology, Signalling and Genomics*.1-14.
- Huberman M, Goren R, Zamski E. 1983. Anatomical aspects of hormonal regulation of abscission in citrus–The shoot-peduncle abscission zone in the non-abscising stage. *Physiol Plant*.59:445-454.
- Kal AJ, van Zonneveld AJ, Benes V, van den Berg M, Koerkamp MG, Albermann K, Strack N, Ruijter JM, Richter A, Dujon B. 1999. Dynamics of gene expression revealed by comparison of serial analysis of gene expression transcript profiles from yeast grown on two different carbon sources. *Molecular biology of the cell*.10:1859-1872.
- Kappel F, Granger A, Hrotkó K, Schuster M. 2012. Cherry. In: *Fruit Breeding*. Springer. p. 459-504.
- Koepke T, Schaeffer S, Harper A, Dicenta F, Edwards M, Henry RJ, Møller BL, Meisel L, Oraguzie N, Silva H. 2013. Comparative genomics analysis in Prunoideae to identify biologically relevant polymorphisms. *Plant Biotechnol J*.11:883-893.
- Kühn N, Serrano A, Abello C, Arce A, Espinoza C, Gouthu S, Deluc L, Arce-Johnson P. 2016. Regulation of polar auxin transport in grapevine fruitlets (*Vitis vinifera* L.) and the proposed role of auxin homeostasis during fruit abscission. *BMC Plant Biol*.16:234.
- Majer C, Hochholdinger F. 2011. Defining the boundaries: structure and function of LOB domain proteins. *Trends Plant Sci*.16:47-52.
- Meir S, Philosoph-Hadas S, Sundaresan S, Selvaraj KSV, Burd S, Ophir R, Kochanek B, Reid MS, Jiang C-Z, Lers A. 2010. Microarray Analysis of the Abscission-Related Transcriptome in the Tomato Flower Abscission Zone in Response to Auxin Depletion1[C][W][OA]. *Plant Physiol*.154:1929-1956.

Merelo P, Agustí J, Arbona V, Costa ML, Estornell LH, Gómez-Cadenas A, Coimbra S, Gómez MD, Pérez-Amador MA, Domingo C. 2017. Cell wall remodeling in abscission zone cells during ethylene-promoted fruit abscission in citrus. *Frontiers in plant science*.8:126.

Mortazavi A, Williams BA, Mccue K, Schaeffer L, Wold B. 2008. Mapping and quantifying mammalian transcriptomes by RNA-Seq. *Nature Methods*.5:621-628.

Niederhuth CE, Patharkar OR, Walker JC. 2013. Transcriptional profiling of the Arabidopsis abscission mutant *hae hsl2* by RNA-Seq. *BMC Genomics*.14:37.

Pfaffl MW. 2001. A new mathematical model for relative quantification in real-time RT-PCR. *Nucleic Acids Res*.29:e45.

Poplin R, Ruano-Rubio V, DePristo MA, Fennell TJ, Carneiro MO, Van der Auwera GA, Kling DE, Gauthier LD, Levy-Moonshine A, Roazen D, et al. 2018. Scaling accurate genetic variant discovery to tens of thousands of samples. *bioRxiv*.201178.

Quero-García J, Schuster M, López-Ortega G, Charlot G. 2017. Sweet cherry varieties and improvement. *Cherries: botany, production and uses* CAB International, Boston.60-94.

Ramakers C, Ruijter JM, Lekanne Deprez RH, Moorman AFM. 2003. Assumption-free analysis of quantitative real-time polymerase chain reaction (PCR) data. *Neurosci Lett*.339:62-66.

Ranocha P, Denancé N, Vanholme R, Freydier A, Martinez Y, Hoffmann L, Köhler L, Pouzet C, Renou JP, Sundberg B. 2010. Walls are thin 1 (WAT1), an Arabidopsis homolog of *Medicago truncatula* NODULIN21, is a tonoplast-localized protein required for secondary wall formation in fibers. *The Plant Journal*.63:469-483.

Ranocha P, Dima O, Felten J, Freydier A, Hoffmann L, Ljung K, Lacombe B, Corratgé C, Thibaud J-B, Sundberg B. WAT1 (WALLS ARE THIN1) defines a novel auxin transporter in



plants and integrates auxin signaling in secondary wall formation in Arabidopsis fibers.

Proceedings of the BMC proceedings; 2011: BioMed Central.

Ranocha P, Dima O, Nagy R, Felten J, Corratgé-Faillie C, Novák O, Morreel K, Lacombe B, Martinez Y, Pfrunder S. 2013. Arabidopsis WAT1 is a vacuolar auxin transport facilitator required for auxin homeostasis. *Nature communications*.4:1-9.

Reed JW. 2001. Roles and activities of Aux/IAA proteins in Arabidopsis. *Trends Plant Sci*.6:420-425.

Roberts Ja, Elliott Ka, Gonzalez-Carranza ZH. 2002. Abscission, dehiscence, and other cell separation processes. *Annu Rev Plant Biol*.53:131-158.

Ruijter JM, Ramakers C, Hoogaars WMH, Karlen Y, Bakker O, van den hoff MJB, Moorman AFM. 2009. Amplification efficiency: Linking baseline and bias in the analysis of quantitative PCR data. *Nucleic Acids Res*.37.

Smith E, Whiting M. 2010. Effect of ethephon on sweet cherry pedicel-fruit retention force and quality is cultivar dependent. *Plant growth regulation*.60:213-223.

Stösser R, Rasmussen H, Bukovac MJ. 1969. Histochemical changes in the developing abscission layer in fruits of *Prunus cerasus* L. *Planta*.86:151-164.

Tabuchi T, Ito S, Arai N. 2000. Structural changes in the abscission zones of pedicels at different ripening stages of tomato. *Journal of the Japanese Society for Horticultural Science*.69:705-707.

Tabuchi T, Wada S, Arai N. Anatomical and cytological study of abscission on processing tomato fruits. *Proceedings of the VI International Symposium on Processing Tomato & Workshop on Irrigation & Fertigation of Processing Tomato* 487; 1998.

Tarazona S, Furió-Tarí P, Ferrer A, Conesa A. 2013. NOISeq: Differential Expression in RNA-seq.

Tarazona S, García F, Ferrer A, Dopazo J, Conesa A. 2011. NOIseq: a RNA-seq differential expression method robust for sequencing depth biases. *EMBnet journal*.17:18-19.

Taylor I, Walker JC. 2018. Transcriptomic evidence for distinct mechanisms underlying abscission deficiency in the Arabidopsis mutants haesa/haesa-like 2 and nevershed. *BMC research notes*.11:1-5.

Taylor JE, Tucker GA, Lasslett Y, Smith CJS, Arnold CM, Watson CF, Schuch W, Grierson D, Roberts JA. 1991. Polygalacturonase expression during leaf abscission of normal and transgenic tomato plants. *Planta*.183:133-138.

Van der Auwera GA, Carneiro MO, Hartl C, Poplin R, del Angel G, Levy-Moonshine A, Jordan T, Shakir K, Roazen D, Thibault J, et al. 2013. From FastQ Data to High-Confidence Variant Calls: The Genome Analysis Toolkit Best Practices Pipeline. *Current Protocols in Bioinformatics*. 2013/10/01;43:11.10.11-11.10.33.

Wittenbach VA, Bukovac MJ. 1974a. Cherry Fruit Abscission, Evidence for Time of initiation and the involvement of Ethylene. *Plant Physiol*.54:494-498.

Wittenbach VA, Bukovac MJ. 1974b. Cherry Fruit Abscission: Evidence for Time of Initiation and the Involvement of Ethylene. *Plant physiology*.54:494-498.

Zhao Y, Athanson B, Whiting M, Oraguzie N. 2013. Pedicel-fruit retention force in sweet cherry (*Prunus avium* L.) varies with genotype and year. *Scientia horticultrae*.150:135-141.

Zhu H, Dardick CD, Beers EP, Callanhan AM, Xia R, Yuan R. 2011. Transcriptomics of shading-induced and NAA-induced abscission in apple (*Malus domestica*) reveals a shared pathway involving reduced photosynthesis, alterations in carbohydrate transport and signaling and hormone crosstalk. *BMC plant biology*.11:138.

## 'Bing'

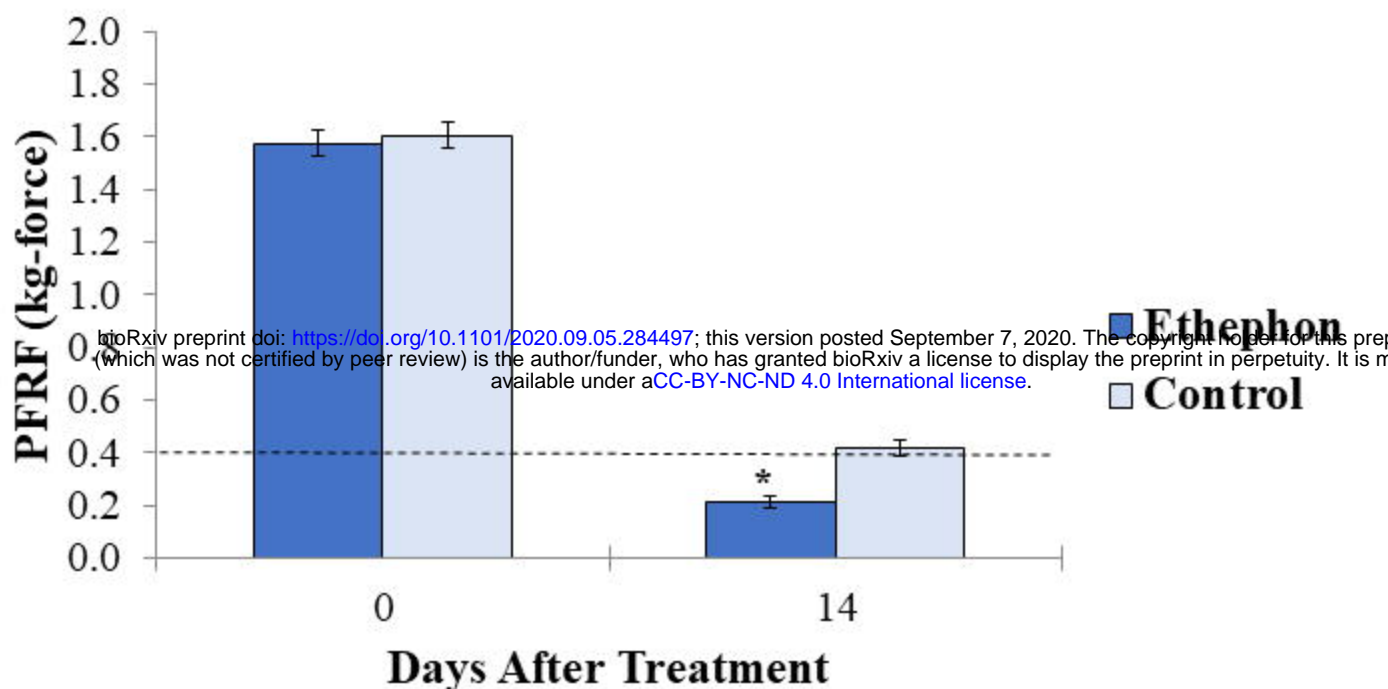

## 'Chelan'

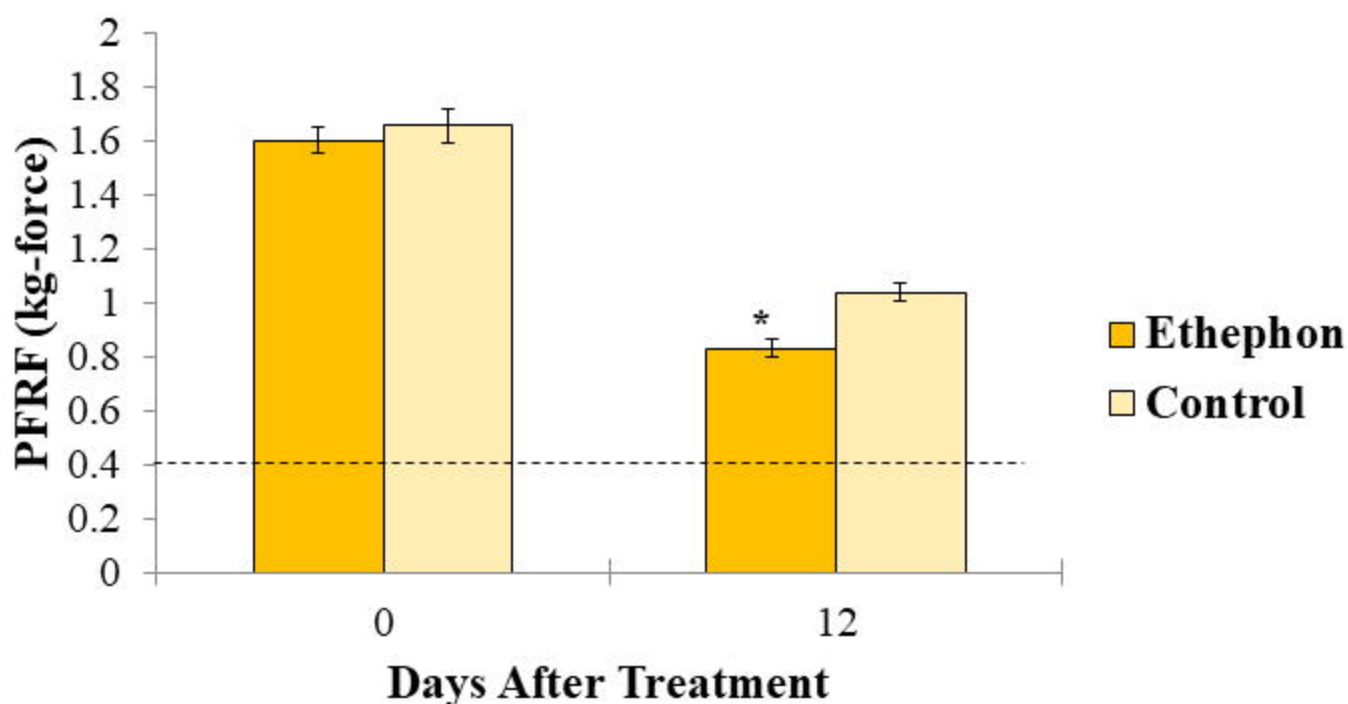

## 'Skeena'

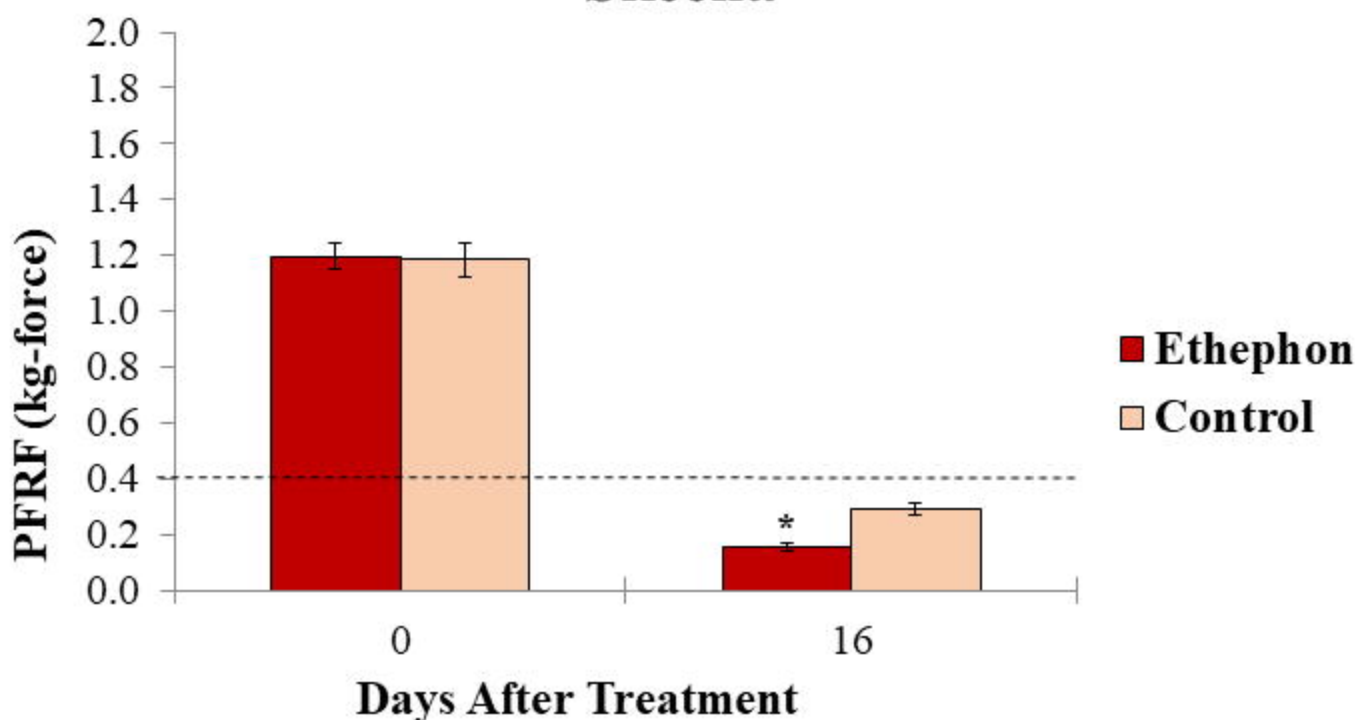

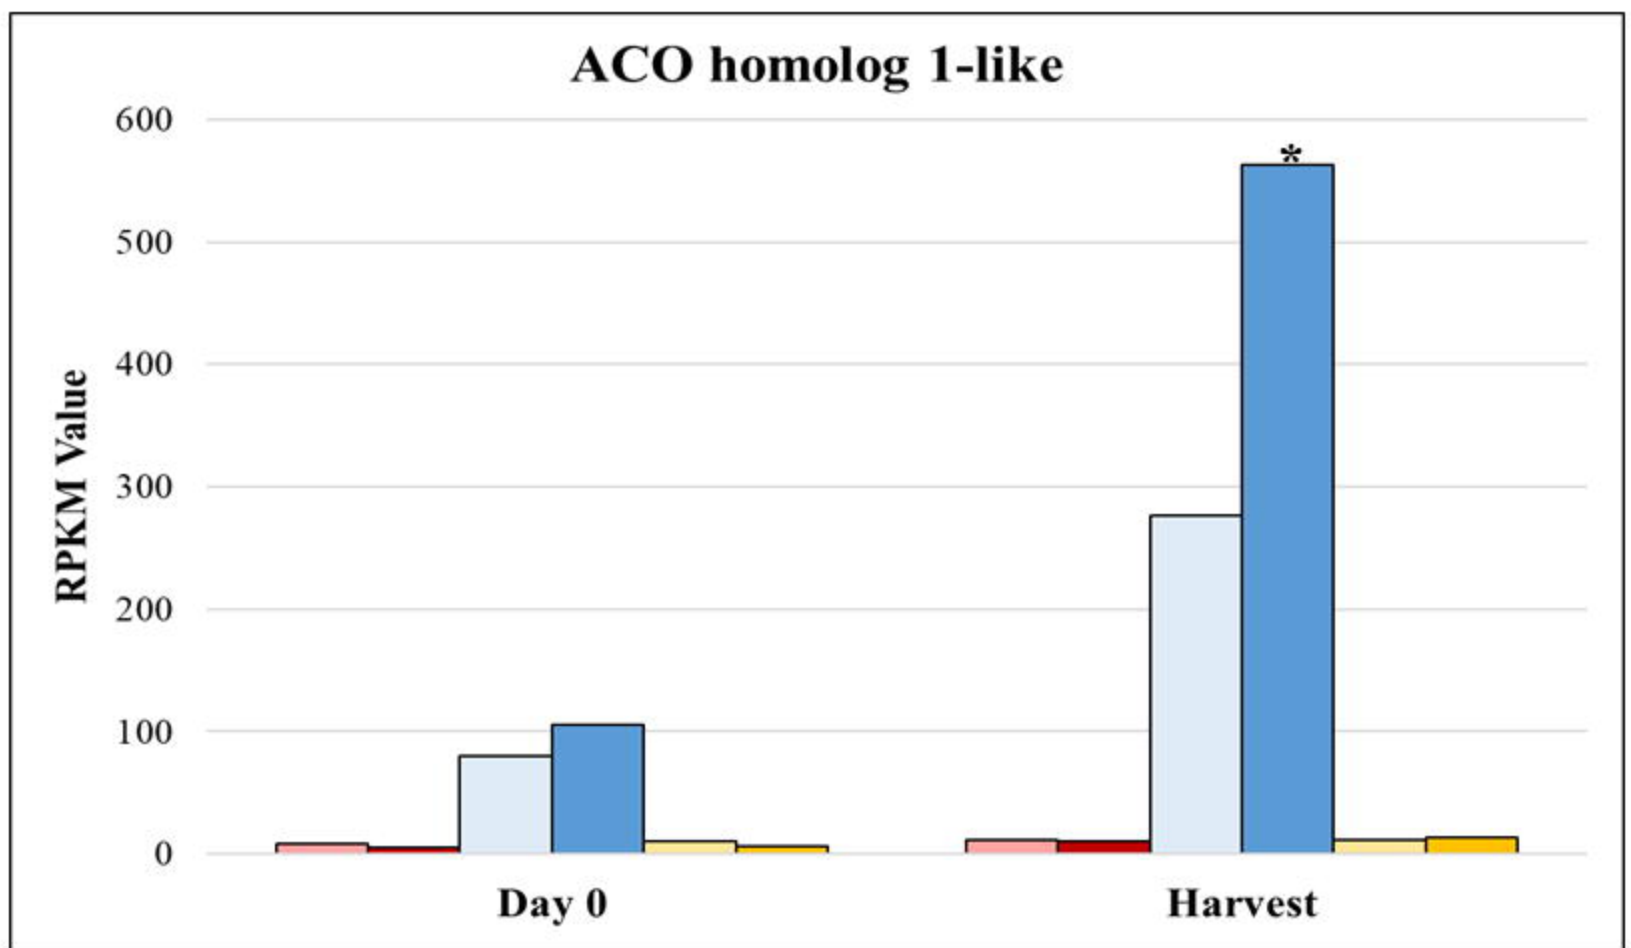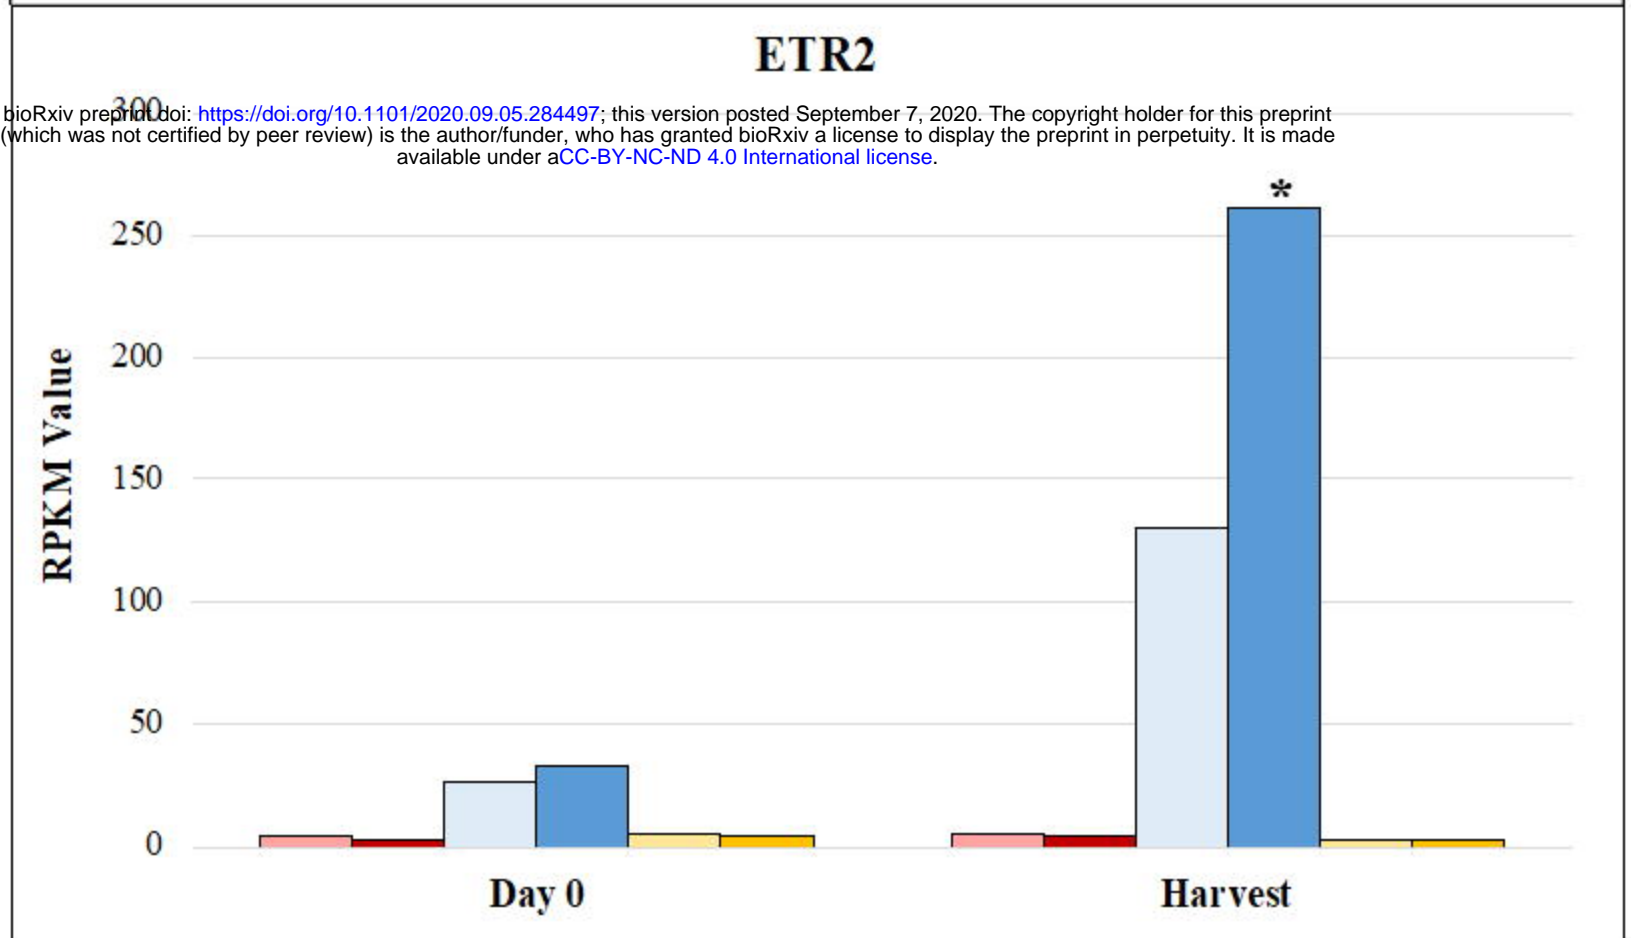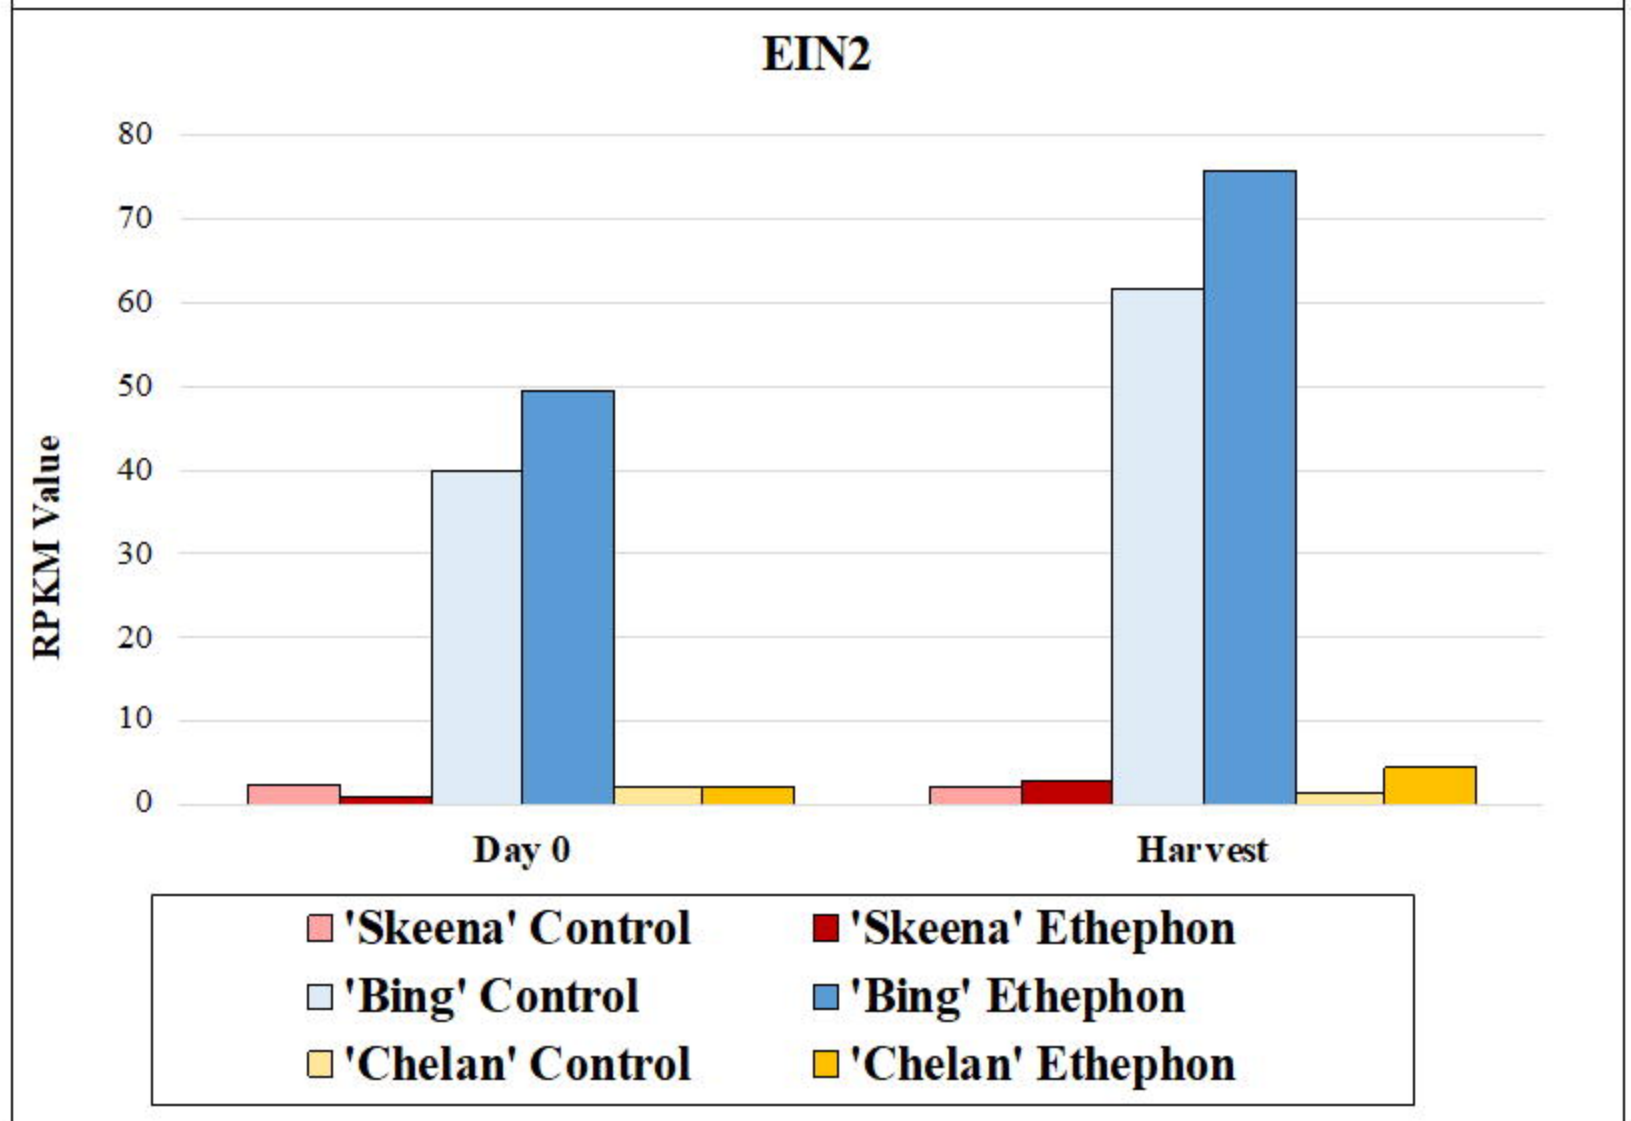

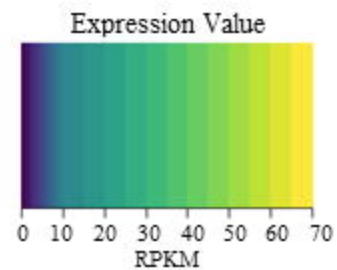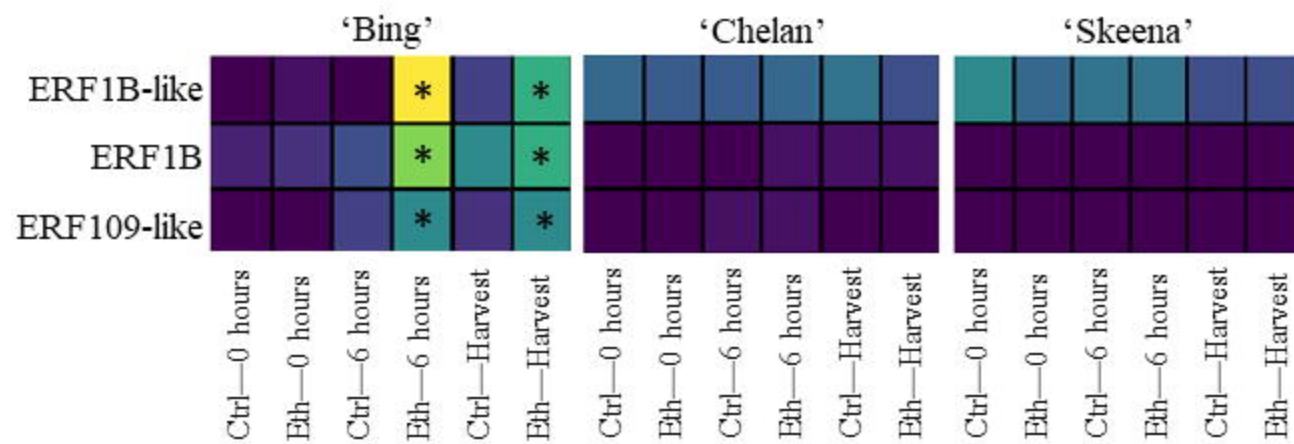

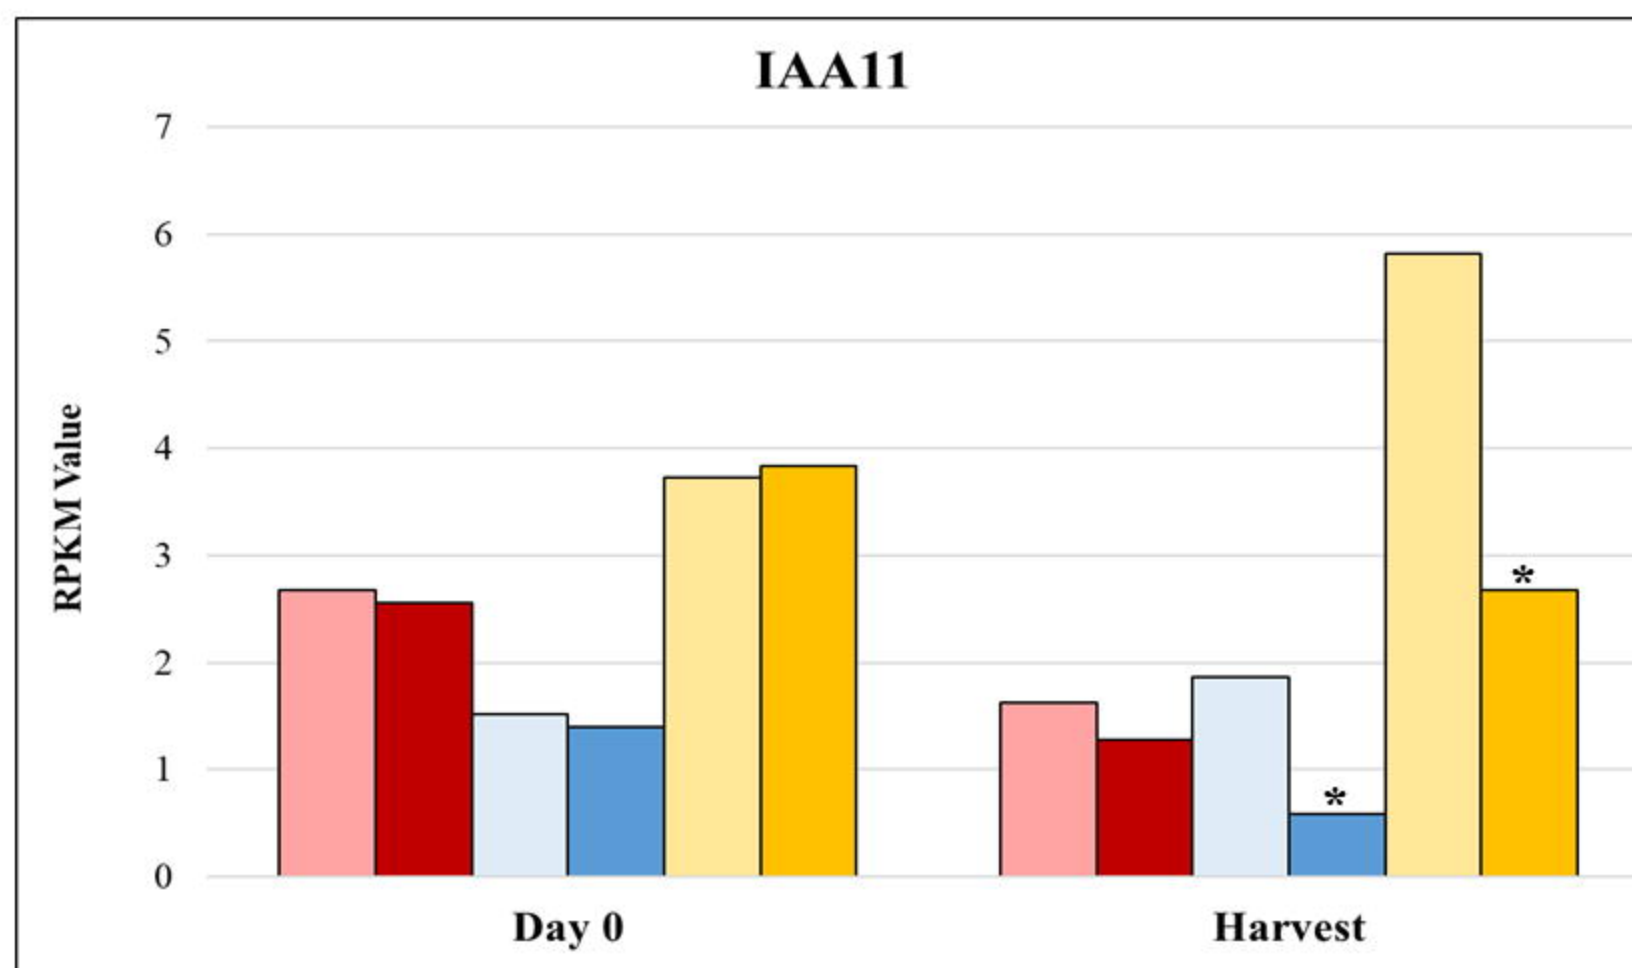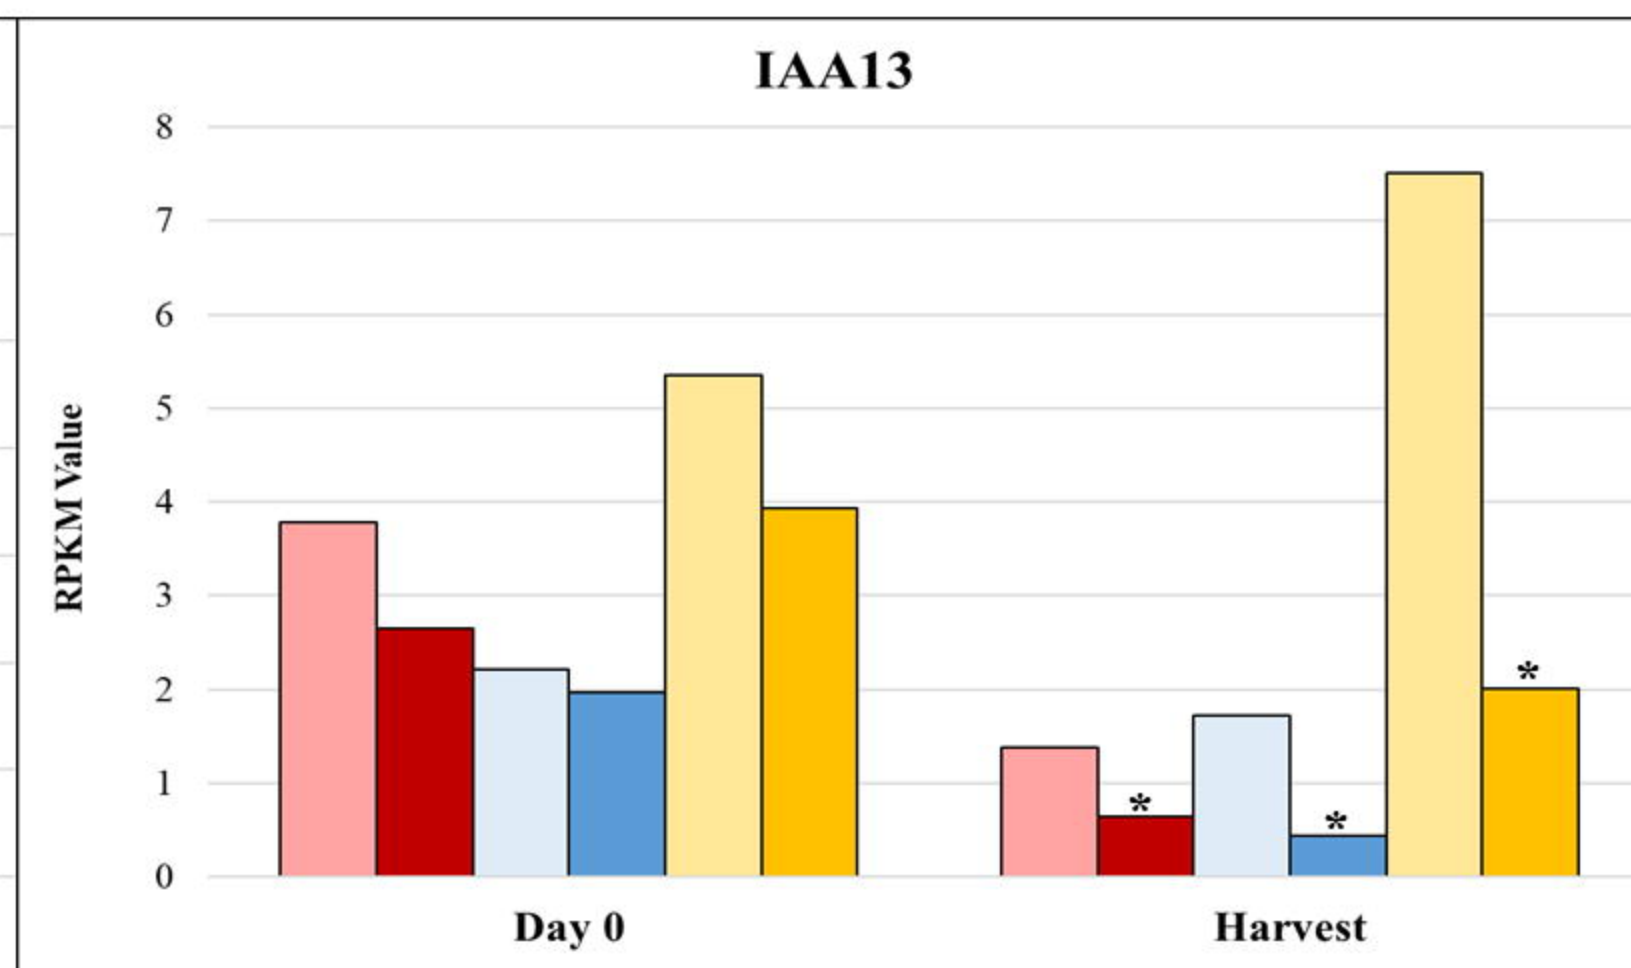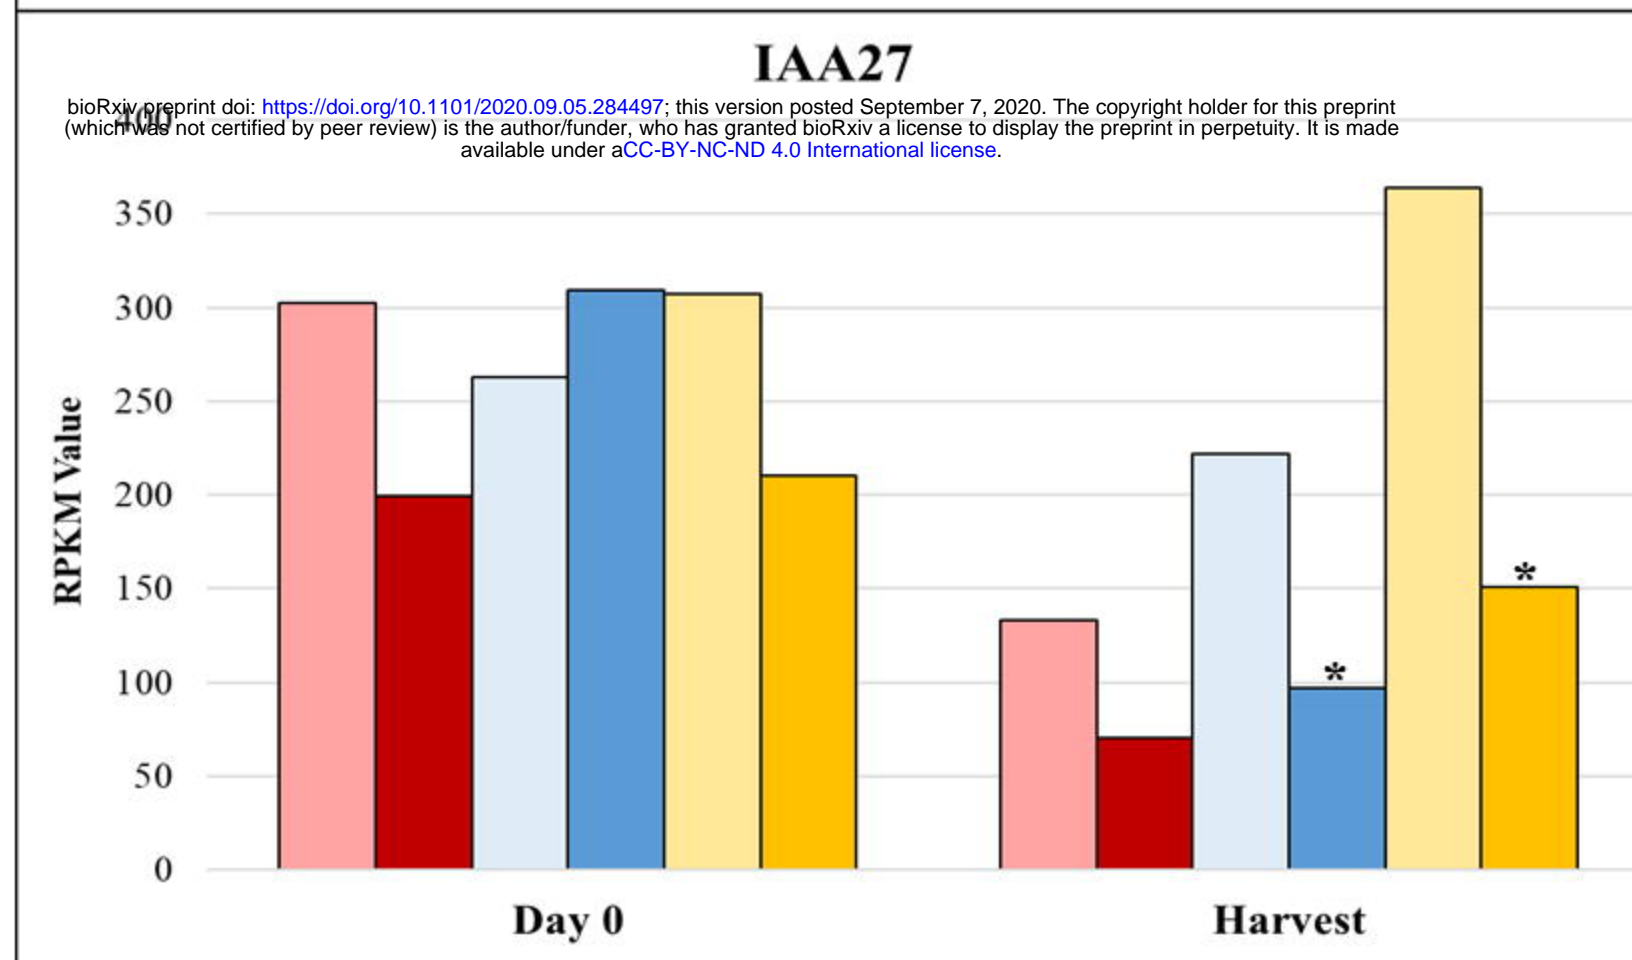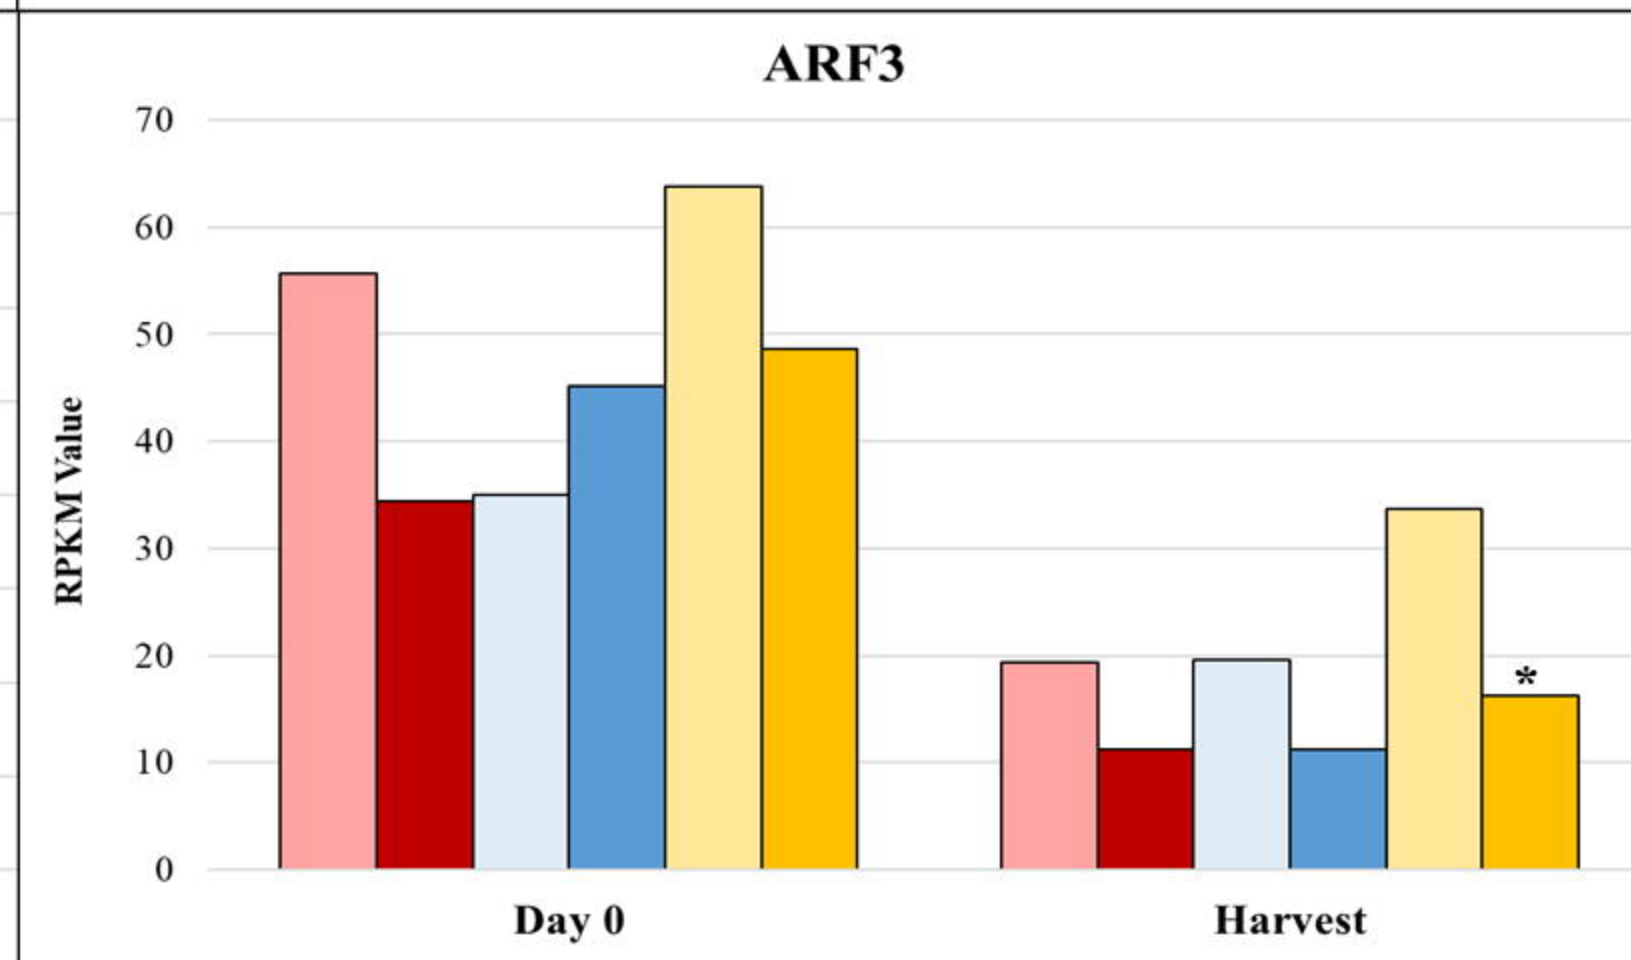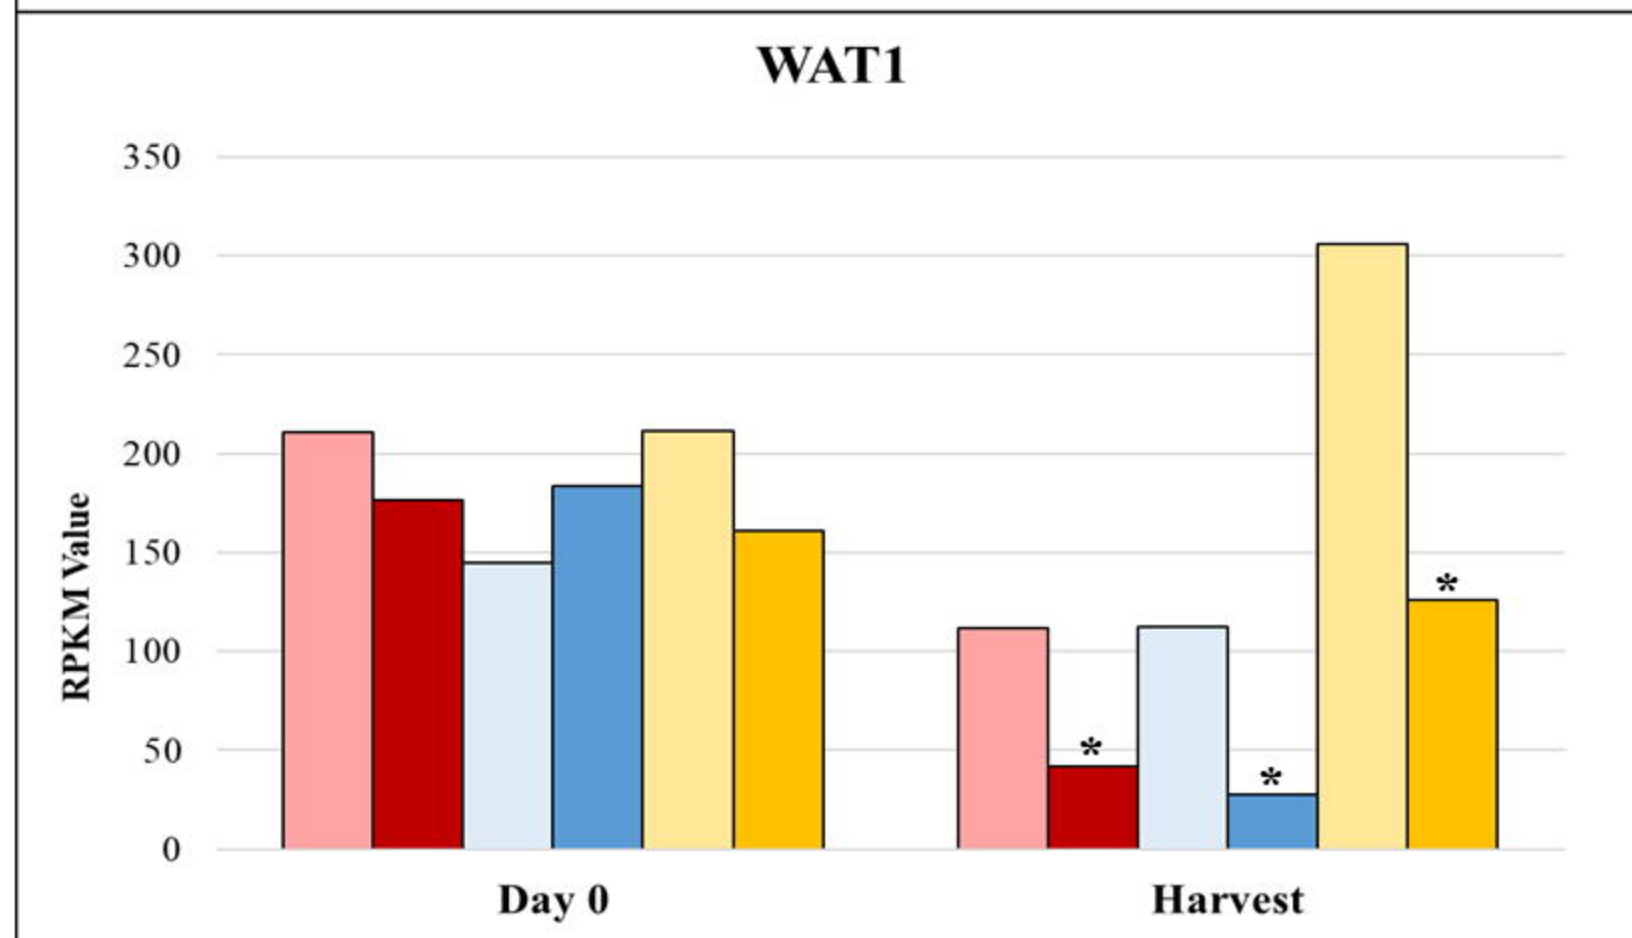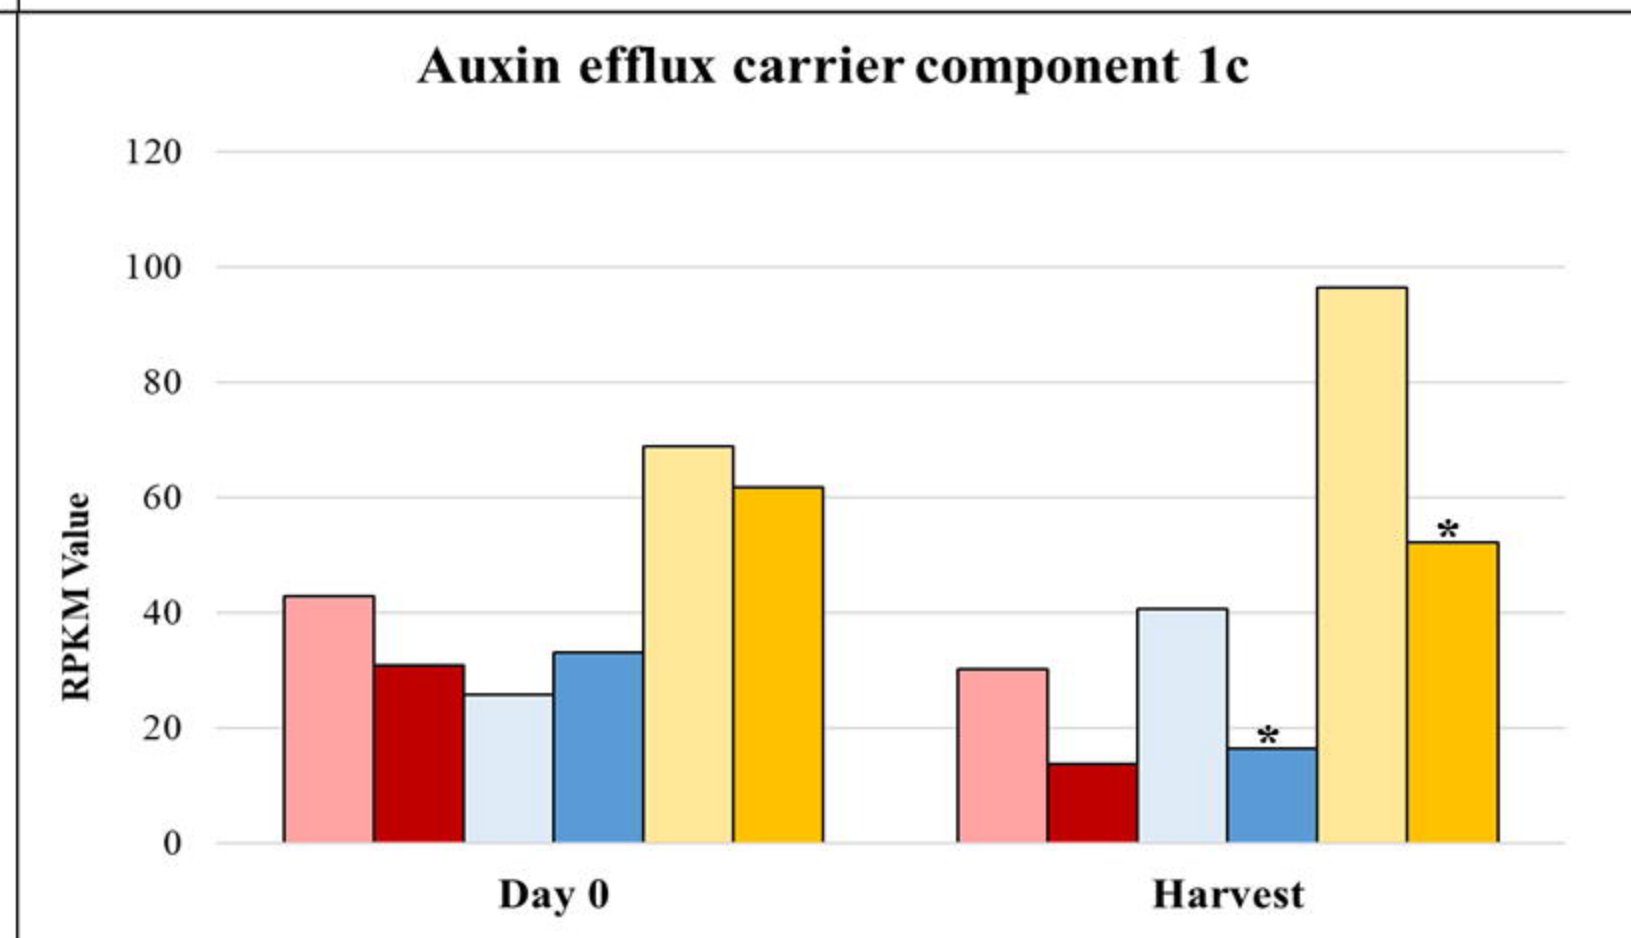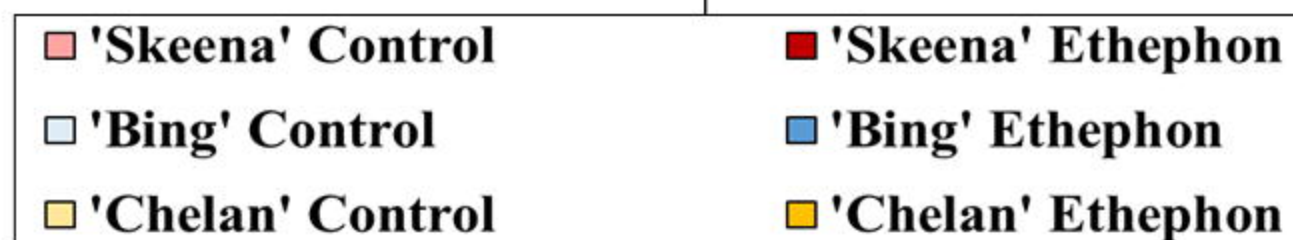

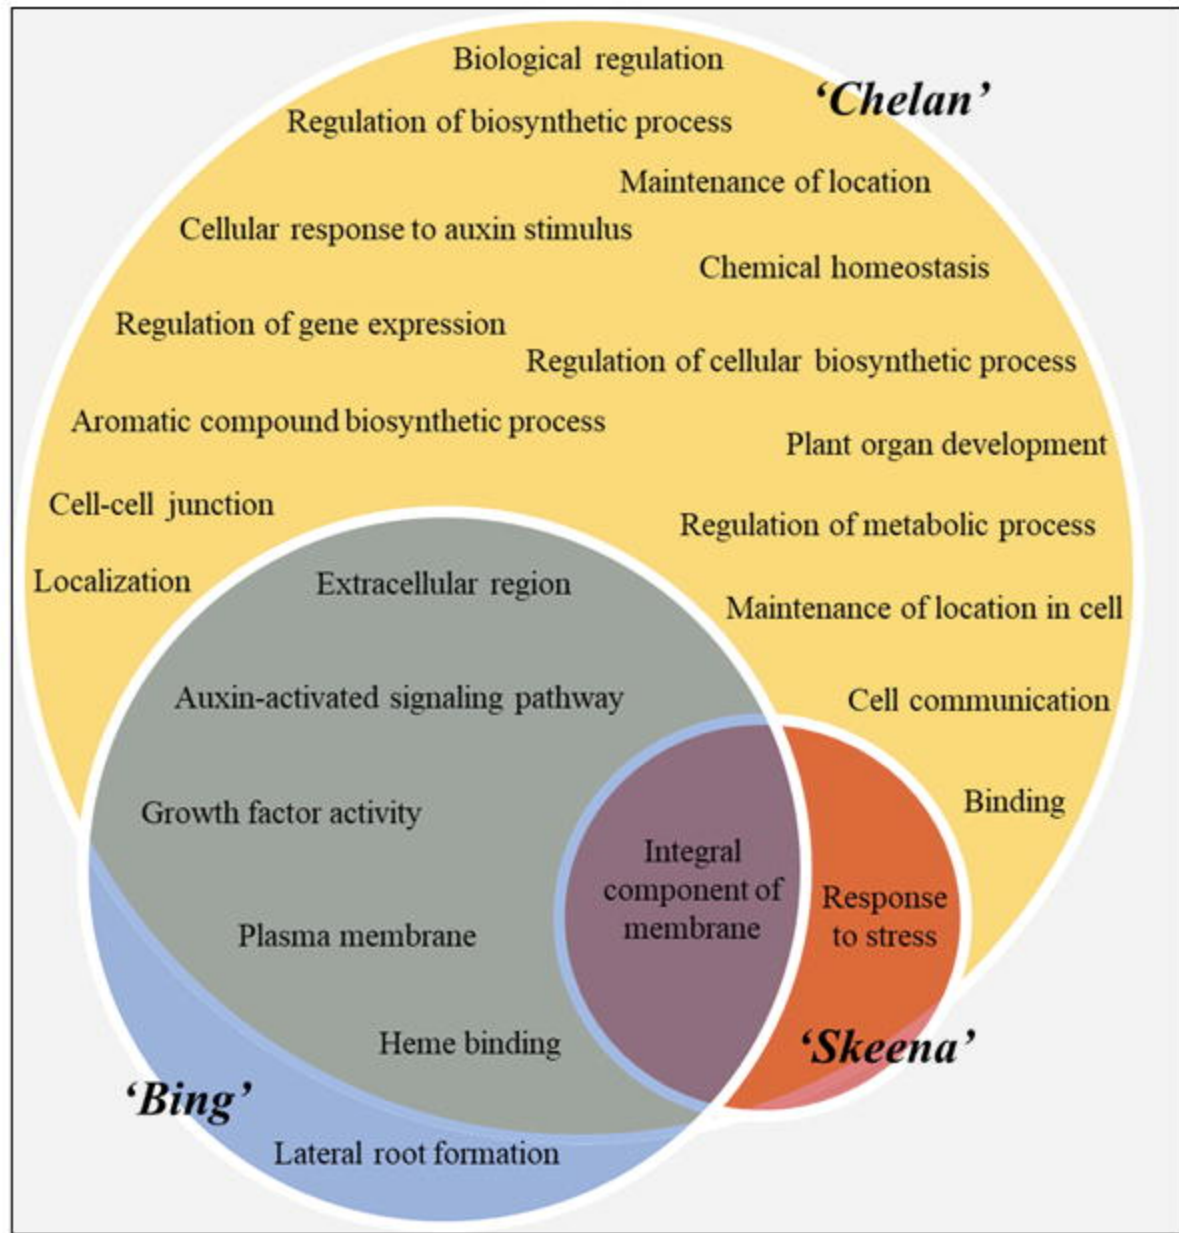

Source: https://www.biorxiv.org/content/10.1101/2020.09.05.284497v1.full.pdf
